# Supplementary material for: The ST22 chronology for the Skytrain Ice Rise ice core – part 2: an age model to the last interglacial and disturbed deep stratigraphy
Source: Copernicus journal article supplement (doi:10.5194/cp-2022-84), 2022-11-07
Supplement: Supplementary file 1 [file cp-2022-84-supplement.zip]

Archive with 6 entries (6 files):
- Supplement_textandfigs.pdf
- Table S1.xlsx
- Table S5_Age_scale.xlsx
- Table_S2.xlsx
- Table_S3.xlsx
- Table_S4.xlsx
