# Supplementary material for: The ST22 chronology for the Skytrain Ice Rise ice core – part 2: an age model to the last interglacial and disturbed deep stratigraphy
Source: Copernicus journal article supplement (doi:10.5194/cp-2022-84), 2022-11-07
Supplement: Supplementary file 1 [file cp-2022-84-supplement.zip › Supplement_textandfigs.pdf]

**Supplement to “The ST22 chronology for the Skytrain Ice Rise ice core - part 2: an age model to the last interglacial and disturbed deep stratigraphy” by Mulvaney et al.**

Supplementary Table S1. Values of methane concentration and  $\delta^{18}\text{O}_{\text{air}}$  for discrete analyses of the Skytrain Ice Rise core. The third tab of this table shows paired values of both measurements for adjacent samples.

Supplementary Table S2. Values of  $^{10}\text{Be}$  measured on Skytrain Ice rise samples across the Laschamp Event.

Supplementary Table S3. Gas age tie points for the Skytrain Ice Rise core.

Supplementary Table S4. Ice age tie points for the Skytrain Ice Rise core.

Supplementary Table S5. ST22 age model for the Skytrain Ice Rise core.

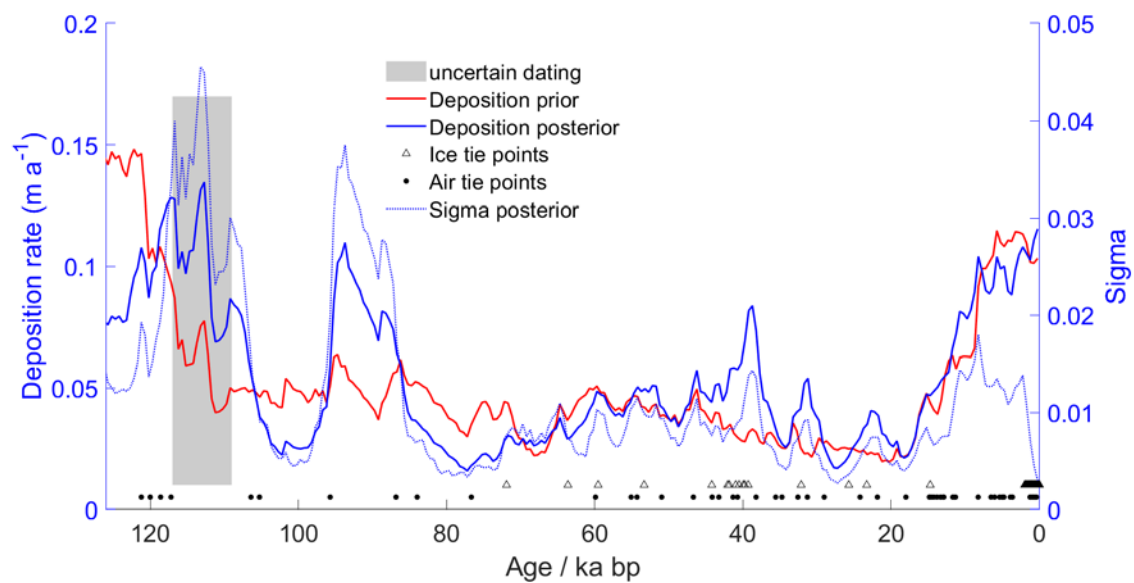

Supplementary Figure 1. Deposition rate at Skytrain Ice Rise: both the prior and the posterior (model output from Paleochrono) are shown. The markers on the x-axis show tie points used within Paleochrono (dots are ice age, triangles are gas age ties). The grey shaded area represents the ice (605-617 m) with unreliable ages due to flow disturbance (see section 9 of main text).

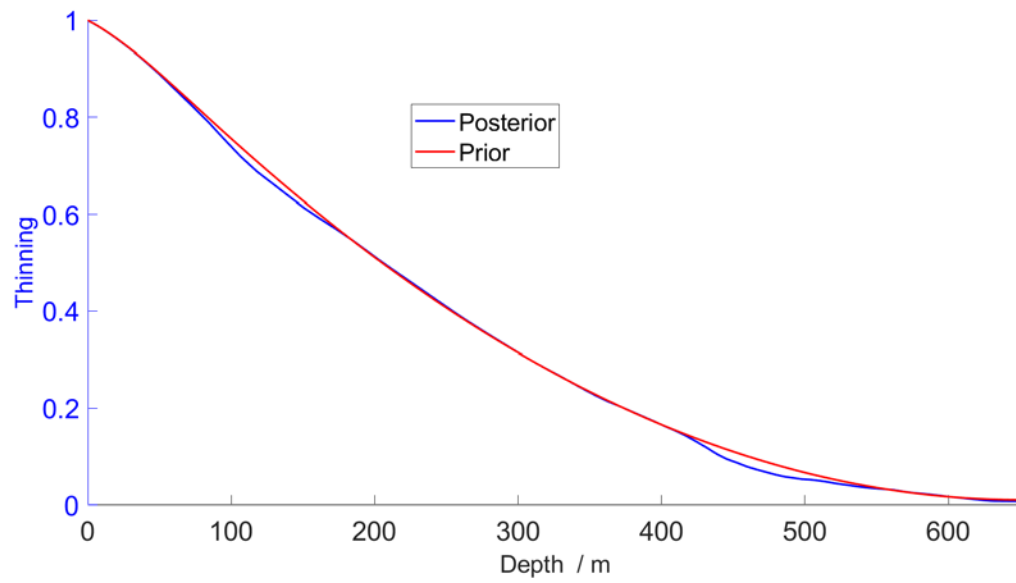

Supplementary Figure 2. Thinning function at Skytrain Ice Rise: both the prior and the posterior (model output from Paleochrono) are shown.
