# Supplementary material for: The ST22 chronology for the Skytrain Ice Rise ice core – part 2: an age model to the last interglacial and disturbed deep stratigraphy
Source: Copernicus journal article supplement (doi:10.5194/cp-2022-84), 2022-11-07
Supplement: Supplementary file 1 [file cp-2022-84-supplement.zip › Table S5_Age_scale.xlsx]

## Sheet: Sheet1
ALC age is the age given by Hoffmann et al (2022) based on known horizons interpolated by layer counting
PC indicates output from Paleochrono
ALC age is stoppedat 1452 bp, so that ALC age and PC age can be merged with exactly the same age
Our recommended ice age scale uses ALC until 1450 bp and PC before that
Where appropriate ages are given in WD2014 and AICC2012 years before present (1950)
Sigma represents the Paleochrono uncertainty
We give no ages for ice we consider disturbed (605-617 m, >628 m, see text)
Depth	ALC age	PC_IceAge	PC_IceAge_WD	PC_IceAge_sigma	PC_AirAge	PC_AirAge_WD	PC_AirAge_sigma	we depth
m	a	a	a	yr	a	a	yr	m
0	-69							0
0.2	-68							0.1
0.4	-67							0.2
0.6	-67							0.2
0.8	-67							0.3
1	-66							0.4
1.2	-66							0.5
1.4	-65							0.6
1.6	-65							0.6
1.8	-64							0.7
2	-63							0.8
2.2	-63							0.9
2.4	-62							1
2.6	-61							1.1
2.8	-60							1.2
3	-60							1.3
3.2	-59							1.4
3.4	-59							1.5
3.6	-58							1.6
3.8	-57							1.7
4	-56							1.8
4.2	-55							1.9
4.4	-54							2
4.6	-53							2
4.8	-53							2.1
5	-52							2.2
5.2	-51							2.3
5.4	-51							2.4
5.6	-50							2.5
5.8	-49							2.6
6	-48							2.7
6.2	-47							2.8
6.4	-47							2.9
6.6	-46							3
6.8	-45							3.2
7	-45							3.3
7.2	-44							3.4
7.4	-43							3.5
7.6	-43							3.6
7.8	-42							3.7
8	-42							3.8
8.2	-40							3.9
8.4	-39							4
8.6	-39							4.1
8.8	-38							4.2
9	-38							4.3
9.2	-37							4.4
9.4	-36							4.6
9.6	-35							4.7
9.8	-34							4.8
10	-33							4.9
10.2	-33							5
10.4	-32							5.1
10.6	-31							5.2
10.8	-31							5.3
11	-30							5.5
11.2	-28							5.6
11.4	-28							5.7
11.6	-27							5.8
11.8	-26							5.9
12	-25							6
12.2	-24							6.1
12.4	-24							6.3
12.6	-23							6.4
12.8	-22							6.5
13	-21							6.6
13.2	-19							6.7
13.4	-19							6.9
13.6	-18							7
13.8	-17							7.1
14	-15							7.2
14.2	-13							7.3
14.4	-12							7.4
14.6	-12							7.5
14.8	-11							7.7
15	-10							7.8
15.2	-9							7.9
15.4	-8							8
15.6	-6							8.2
15.8	-4							8.3
16	-3							8.4
16.2	-2							8.5
16.4	0							8.6
16.6	1							8.7
16.8	2							8.9
17	4							9
17.2	5							9.1
17.4	6							9.2
17.6	7							9.4
17.8	8							9.5
18	9							9.6
18.2	11							9.7
18.4	12							9.9
18.6	13							10
18.8	14							10.1
19	15							10.2
19.2	17							10.4
19.4	18							10.5
19.6	19							10.6
19.8	20							10.7
20	21							10.9
20.2	22							11
20.4	24							11.1
20.6	24							11.3
20.8	25							11.4
21	26							11.5
21.2	27							11.6
21.4	28							11.8
21.6	30							11.9
21.8	30							12
22	32							12.1
22.2	33							12.3
22.4	35							12.4
22.6	36							12.5
22.8	38							12.7
23	39							12.8
23.2	40							12.9
23.4	41							13.1
23.6	42							13.2
23.8	43							13.3
24	45							13.5
24.2	46							13.6
24.4	48							13.7
24.6	49							13.8
24.8	51							14
25	52							14.1
25.2	53							14.2
25.4	54							14.4
25.6	55							14.5
25.8	56							14.7
26	56							14.8
26.2	57							14.9
26.4	58							15.1
26.6	59							15.2
26.8	60							15.3
27	62							15.5
27.2	63							15.6
27.4	64							15.7
27.6	65							15.9
27.8	66							16
28	67							16.1
28.2	68							16.3
28.4	69							16.4
28.6	69							16.5
28.8	71							16.7
29	73							16.8
29.2	74							17
29.4	75							17.1
29.6	77							17.3
29.8	78							17.4
30	80							17.5
30.2	81							17.7
30.4	83							17.8
30.6	84							18
30.8	85							18.1
31	87							18.2
31.2	88							18.4
31.4	88							18.5
31.6	90							18.6
31.8	91							18.8
32	92							18.9
32.2	94							19.1
32.4	96							19.2
32.6	96							19.4
32.8	98							19.5
33	100							19.7
33.2	101							19.8
33.4	102							19.9
33.6	103							20.1
33.8	105							20.2
34	106							20.4
34.2	107							20.5
34.4	108							20.7
34.6	110							20.8
34.8	111							21
35	113							21.1
35.2	114							21.3
35.4	116							21.4
35.6	117							21.5
35.8	118							21.7
36	119							21.8
36.2	120							22
36.4	122							22.1
36.6	123							22.3
36.8	124							22.4
37	125							22.6
37.2	127							22.7
37.4	128							22.9
37.6	129							23
37.8	131							23.2
38	132							23.3
38.2	134							23.5
38.4	136							23.6
38.6	137							23.8
38.8	138							23.9
39	140							24.1
39.2	142							24.2
39.4	143							24.4
39.6	145							24.5
39.8	146							24.7
40	149							24.8
40.2	150							25
40.4	152							25.1
40.6	153							25.3
40.8	156							25.4
41	157							25.6
41.2	158							25.7
41.4	160							25.9
41.6	162							26.1
41.8	164							26.2
42	166							26.4
42.2	167							26.5
42.4	170							26.7
42.6	171							26.8
42.8	174							27
43	176							27.1
43.2	178							27.3
43.4	180							27.5
43.6	182							27.6
43.8	184							27.8
44	185							27.9
44.2	187							28.1
44.4	189							28.2
44.6	190							28.4
44.8	192							28.6
45	195							28.7
45.2	198							28.9
45.4	200							29
45.6	202							29.2
45.8	203							29.3
46	204							29.5
46.2	206							29.7
46.4	207							29.8
46.6	209							30
46.8	210							30.1
47	212							30.3
47.2	214							30.5
47.4	216							30.6
47.6	217							30.8
47.8	218							30.9
48	220							31.1
48.2	222							31.3
48.4	224							31.4
48.6	225							31.6
48.8	227							31.7
49	229							31.9
49.2	231							32.1
49.4	232							32.2
49.6	233							32.4
49.8	235							32.5
50	236							32.7
50.2	237							32.9
50.4	238							33
50.6	240							33.2
50.8	242							33.4
51	243							33.5
51.2	244							33.7
51.4	246							33.8
51.6	248							34
51.8	250							34.2
52	252							34.3
52.2	254							34.5
52.4	255							34.6
52.6	257							34.8
52.8	258							35
53	261							35.1
53.2	262							35.3
53.4	264							35.5
53.6	266							35.6
53.8	268							35.8
54	269							36
54.2	271							36.1
54.4	272							36.3
54.6	274							36.5
54.8	276							36.6
55	278							36.8
55.2	280							37
55.4	282							37.1
55.6	283							37.3
55.8	285							37.5
56	287							37.7
56.2	288							37.8
56.4	290							38
56.6	291							38.1
56.8	292							38.3
57	294							38.5
57.2	297							38.6
57.4	298							38.8
57.6	299							39
57.8	301							39.1
58	303				3	5	15	39.3
58.2	305				4	6	16	39.5
58.4	307				6	8	11	39.7
58.6	309				7	9	11	39.8
58.8	311				9	11	16	40
59	313				11	13	17	40.2
59.2	315				13	15	17	40.3
59.4	318				15	18	17	40.5
59.6	319				17	20	17	40.7
59.8	321				20	22	17	40.8
60	323				21	24	14	41
60.2	325				23	26	13	41.2
60.4	326				25	27	14	41.3
60.6	327				27	29	16	41.5
60.8	328				29	31	14	41.7
61	330				30	33	8	41.8
61.2	332				31	34	12	42
61.4	333				33	36	13	42.2
61.6	335				35	37	13	42.3
61.8	338				36	39	13	42.5
62	340				38	41	19	42.7
62.2	343				41	43	15	42.8
62.4	344				42	45	12	43
62.6	347				44	47	12	43.2
62.8	350				45	48	14	43.3
63	351				47	50	10	43.5
63.2	352				48	51	9	43.7
63.4	355				49	52	9	43.8
63.6	356				50	53	8	44
63.8	358				51	55	9	44.2
64	361				53	56	13	44.3
64.2	363				55	58	18	44.5
64.4	366				57	60	11	44.7
64.6	368				58	62	13	44.9
64.8	371				60	64	14	45
65	372				62	66	10	45.2
65.2	374				63	67	10	45.4
65.4	376				65	69	13	45.5
65.6	378				67	71	19	45.7
65.8	381				70	73	14	45.9
66	383				71	75	9	46
66.2	386				72	76	8	46.2
66.4	387				74	78	13	46.4
66.6	389				76	80	19	46.5
66.8	390				79	83	19	46.7
67	393				82	86	16	46.9
67.2	397				83	88	10	47.1
67.4	400				85	89	12	47.2
67.6	401				87	91	16	47.4
67.8	404				90	94	14	47.6
68	406				91	96	10	47.8
68.2	408				93	97	10	47.9
68.4	409				94	99	11	48.1
68.6	412				96	101	12	48.3
68.8	414				98	102	11	48.4
69	416				99	104	12	48.6
69.2	418				101	106	14	48.8
69.4	420				103	108	14	48.9
69.6	422				106	110	12	49.1
69.8	423				107	112	12	49.3
70	425				109	114	10	49.5
70.2	427				110	115	7	49.6
70.4	429				112	117	10	49.8
70.6	432				113	118	12	50
70.8	435				115	120	11	50.2
71	436				117	122	11	50.3
71.2	438				118	124	9	50.5
71.4	439				120	125	8	50.7
71.6	441				121	126	9	50.8
71.8	443				123	128	14	51
72	446				126	131	20	51.2
72.2	450				129	134	15	51.4
72.4	453				130	136	10	51.5
72.6	455				132	137	13	51.7
72.8	457				134	140	15	51.9
73	458				137	142	12	52.1
73.2	461				138	144	9	52.2
73.4	462				140	146	14	52.4
73.6	465				143	148	12	52.6
73.8	467				145	150	9	52.8
74	468				146	151	10	52.9
74.2	470				148	153	10	53.1
74.4	472				150	155	12	53.3
74.6	474				152	157	14	53.5
74.8	476				155	160	15	53.7
75	478				158	163	16	53.8
75.2	481				161	166	16	54
75.4	483				163	168	13	54.2
75.6	485				165	170	11	54.3
75.8	487				167	172	9	54.5
76	488				169	174	9	54.7
76.2	490				170	175	12	54.9
76.4	491				173	178	15	55.1
76.6	493				176	181	11	55.2
76.8	495				177	182	10	55.4
77	497				179	184	12	55.6
77.2	499				181	186	10	55.8
77.4	500				183	188	10	55.9
77.6	502				185	190	9	56.1
77.8	504				187	192	11	56.3
78	506				189	194	12	56.5
78.2	508				191	196	11	56.6
78.4	510				193	198	11	56.8
78.6	511				195	200	13	57
78.8	513				198	203	15	57.2
79	515				201	206	15	57.3
79.2	516				204	208	11	57.5
79.4	518				206	211	13	57.7
79.6	520				209	213	10	57.9
79.8	522				211	215	10	58.1
80	524				213	217	12	58.2
80.2	526				215	219	12	58.4
80.4	528				218	222	16	58.6
80.6	530				221	226	13	58.8
80.8	532				224	228	10	58.9
81	533				225	230	9	59.1
81.2	536				227	232	11	59.3
81.4	538				230	234	13	59.5
81.6	540				233	237	15	59.7
81.8	543				237	241	20	59.8
82	544				240	244	12	60
82.2	547				243	247	13	60.2
82.4	550				246	250	16	60.4
82.6	552				249	253	15	60.5
82.8	554				253	257	14	60.7
83	556				255	259	8	60.9
83.2	558				256	260	7	61.1
83.4	560				258	262	10	61.2
83.6	562				261	264	10	61.4
83.8	563				263	267	10	61.6
84	565				265	269	11	61.8
84.2	567				268	271	8	61.9
84.4	568				270	273	8	62.1
84.6	570				271	275	7	62.3
84.8	572				273	276	7	62.5
85	575				275	278	9	62.7
85.2	576				277	280	10	62.8
85.4	578				280	283	10	63
85.6	581				282	285	9	63.2
85.8	582				284	288	10	63.4
86	583				287	290	10	63.5
86.2	585				290	293	8	63.7
86.4	587				292	295	8	63.9
86.6	590				294	297	6	64.1
86.8	593				295	298	7	64.3
87	594				298	301	10	64.4
87.2	597				300	303	8	64.6
87.4	600				303	305	7	64.8
87.6	602				304	307	7	65
87.8	604				307	309	7	65.1
88	606				309	312	7	65.3
88.2	608				310	313	6	65.5
88.4	610				313	315	8	65.7
88.6	612				315	318	8	65.9
88.8	614				318	320	8	66
89	616				320	323	9	66.2
89.2	617				323	326	10	66.4
89.4	619				326	329	9	66.6
89.6	622				329	331	7	66.7
89.8	624				331	333	7	66.9
90	627				333	336	8	67.1
90.2	628				336	338	7	67.3
90.4	630				338	340	6	67.5
90.6	632				340	342	6	67.6
90.8	634				342	344	7	67.8
91	636				344	346	8	68
91.2	639				346	348	6	68.2
91.4	641				348	350	6	68.4
91.6	644				350	352	6	68.5
91.8	647				352	354	6	68.7
92	650				354	356	7	68.9
92.2	652				356	358	7	69.1
92.4	654				359	361	7	69.2
92.6	656				361	363	6	69.4
92.8	658				363	365	7	69.6
93	661				366	368	7	69.8
93.2	664				368	370	7	70
93.4	666				371	373	8	70.1
93.6	667				374	375	7	70.3
93.8	670				376	378	8	70.5
94	673				379	381	8	70.7
94.2	675				382	383	7	70.8
94.4	678				384	386	7	71
94.6	681				387	388	6	71.2
94.8	683				389	391	7	71.4
95	686				392	393	6	71.6
95.2	689				394	395	6	71.7
95.4	692				396	397	7	71.9
95.6	694				399	400	6	72.1
95.8	697				401	402	7	72.3
96	699				404	405	7	72.5
96.2	701				407	408	5	72.6
96.4	704				408	409	5	72.8
96.6	706				410	411	6	73
96.8	708				413	414	6	73.2
97	711				416	417	8	73.4
97.2	714				419	419	8	73.5
97.4	718				422	422	8	73.7
97.6	721				424	425	6	73.9
97.8	724				427	428	7	74.1
98	726				429	430	7	74.2
98.2	728				432	433	7	74.4
98.4	730				434	435	5	74.6
98.6	731				436	437	6	74.8
98.8	732				438	439	6	75
99	735				441	442	8	75.1
99.2	737				444	444	7	75.3
99.4	739				447	447	8	75.5
99.6	741				449	449	6	75.7
99.8	743				451	452	6	75.8
100	745				454	454	7	76
100.2	747				456	456	6	76.2
100.4	750				458	458	7	76.4
100.6	752				461	461	8	76.6
100.8	755				464	464	6	76.7
101	757				466	466	6	76.9
101.2	759				468	468	7	77.1
101.4	761				471	471	7	77.3
101.6	763				473	473	7	77.5
101.8	765				476	476	6	77.6
102	768				477	477	5	77.8
102.2	770				479	479	7	78
102.4	772				482	482	8	78.2
102.6	775				485	484	7	78.3
102.8	778				487	487	8	78.5
103	780				490	489	5	78.7
103.2	781				491	491	5	78.9
103.4	783				493	493	7	79
103.6	785				496	495	7	79.2
103.8	787				498	498	7	79.4
104	789				501	500	7	79.6
104.2	791				503	502	6	79.7
104.4	794				505	504	6	79.9
104.6	795				508	507	7	80.1
104.8	797				510	509	6	80.3
105	800				512	511	7	80.4
105.2	802				515	514	6	80.6
105.4	803				517	516	7	80.8
105.6	805				519	518	6	81
105.8	807				521	520	5	81.2
106	809				524	523	6	81.3
106.2	811				526	525	6	81.5
106.4	813				528	527	7	81.7
106.6	815				531	530	7	81.9
106.8	817				534	532	6	82
107	820				536	534	5	82.2
107.2	822				538	536	6	82.4
107.4	824				540	538	5	82.6
107.6	827				542	540	6	82.8
107.8	830				544	543	6	82.9
108	833				546	545	6	83.1
108.2	836				549	547	6	83.3
108.4	838				551	549	5	83.5
108.6	839				552	551	5	83.7
108.8	842				554	553	5	83.8
109	844				556	555	5	84
109.2	847				559	557	7	84.2
109.4	850				562	560	7	84.4
109.6	853				564	562	8	84.6
109.8	855				568	566	9	84.7
110	858				571	569	6	84.9
110.2	860				573	571	6	85.1
110.4	862				576	573	8	85.3
110.6	865				579	577	9	85.5
110.8	868				583	580	8	85.6
111	870				586	584	8	85.8
111.2	872				588	586	6	86
111.4	875				591	588	5	86.2
111.6	878				592	590	6	86.4
111.8	880				595	592	7	86.6
112	883				597	595	6	86.7
112.2	885				600	597	6	86.9
112.4	886				602	600	9	87.1
112.6	889				606	603	9	87.3
112.8	892				609	606	8	87.5
113	895				612	609	7	87.6
113.2	898				614	611	6	87.8
113.4	901				617	614	9	88
113.6	903				620	617	6	88.2
113.8	905				622	619	5	88.4
114	909				624	621	4	88.5
114.2	912				625	622	5	88.7
114.4	914				627	624	7	88.9
114.6	916				630	627	7	89.1
114.8	919				632	629	6	89.3
115	922				635	631	6	89.4
115.2	924				637	634	6	89.6
115.4	926				639	636	6	89.8
115.6	927				642	638	5	90
115.8	928				644	640	7	90.1
116	930				647	644	8	90.3
116.2	933				650	646	7	90.5
116.4	936				653	649	7	90.7
116.6	938				655	652	6	90.9
116.8	939				658	654	6	91
117	941				660	657	7	91.2
117.2	944				663	659	5	91.4
117.4	947				665	661	5	91.6
117.6	949				667	663	5	91.8
117.8	951				669	665	5	92
118	954				671	667	6	92.1
118.2	955				674	670	5	92.3
118.4	957				676	672	6	92.5
118.6	959				678	674	6	92.7
118.8	962				681	677	6	92.9
119	965				684	680	6	93
119.2	967				686	682	6	93.2
119.4	969				688	684	4	93.4
119.6	973				690	686	5	93.6
119.8	975				693	688	6	93.8
120	978				695	690	6	93.9
120.2	980				697	693	7	94.1
120.4	982				700	696	6	94.3
120.6	985				703	698	6	94.5
120.8	988				705	701	4	94.7
121	992				707	702	4	94.8
121.2	995				709	704	6	95
121.4	998				712	707	7	95.2
121.6	1001				714	710	6	95.4
121.8	1004				717	712	7	95.6
122	1006				719	715	7	95.7
122.2	1008				722	718	7	95.9
122.4	1011				725	721	8	96.1
122.6	1014				728	724	7	96.3
122.8	1017				731	726	6	96.5
123	1019				733	728	6	96.6
123.2	1022				735	731	6	96.8
123.4	1025				738	733	7	97
123.6	1027				741	736	7	97.2
123.8	1030				744	739	7	97.4
124	1032				746	742	6	97.5
124.2	1033				749	744	7	97.7
124.4	1036				751	747	9	97.9
124.6	1039				754	750	9	98.1
124.8	1043				757	753	8	98.3
125	1047				760	755	7	98.4
125.2	1050				762	758	7	98.6
125.4	1053				765	760	7	98.8
125.6	1055				767	763	7	99
125.8	1058				770	765	7	99.1
126	1061				772	767	7	99.3
126.2	1064				775	770	7	99.5
126.4	1069				777	772	6	99.7
126.6	1073				780	775	7	99.9
126.8	1077				783	778	9	100
127	1080				785	780	6	100.2
127.2	1082				787	782	6	100.4
127.4	1085				789	784	6	100.6
127.6	1088				791	786	6	100.8
127.8	1092				793	788	6	100.9
128	1095				795	790	6	101.1
128.2	1099				797	792	5	101.3
128.4	1102				798	794	5	101.5
128.6	1106				801	796	6	101.7
128.8	1110				803	798	6	101.8
129	1114				805	800	6	102
129.2	1116				807	802	6	102.2
129.4	1119				809	804	6	102.4
129.6	1122				811	807	7	102.6
129.8	1124				814	809	6	102.7
130	1126				816	811	7	102.9
130.2	1127				819	814	8	103.1
130.4	1130				822	817	7	103.3
130.6	1133				824	820	8	103.5
130.8	1136				827	822	7	103.6
131	1139				830	825	8	103.8
131.2	1142				832	828	7	104
131.4	1144				835	830	9	104.2
131.6	1146				839	834	10	104.3
131.8	1149				842	837	7	104.5
132	1152				844	839	7	104.7
132.2	1153				847	842	7	104.9
132.4	1155				849	844	7	105
132.6	1159				851	846	6	105.2
132.8	1161				853	848	6	105.4
133	1165				855	850	7	105.6
133.2	1168				858	853	7	105.8
133.4	1172				860	855	7	106
133.6	1175				862	857	7	106.1
133.8	1178				865	860	7	106.3
134	1180				867	863	7	106.5
134.2	1184				870	865	7	106.7
134.4	1186				872	867	7	106.9
134.6	1188				874	869	7	107
134.8	1191				876	872	9	107.2
135	1195				879	875	7	107.4
135.2	1197				882	877	7	107.6
135.4	1200				884	879	7	107.8
135.6	1205				887	882	8	107.9
135.8	1209				889	885	8	108.1
136	1212				892	888	9	108.3
136.2	1215				896	891	8	108.5
136.4	1217				898	893	7	108.7
136.6	1220				900	895	7	108.8
136.8	1222				903	898	9	109
137	1224				907	902	8	109.2
137.2	1226				909	904	7	109.4
137.4	1230				912	907	8	109.6
137.6	1233				915	910	8	109.7
137.8	1236				917	913	7	109.9
138	1238				920	915	7	110.1
138.2	1241				923	918	8	110.3
138.4	1245				926	921	8	110.5
138.6	1248				929	924	7	110.6
138.8	1251				932	927	7	110.8
139	1253				934	930	8	111
139.2	1256				938	933	8	111.2
139.4	1259				941	936	7	111.4
139.6	1261				943	939	8	111.5
139.8	1263				947	942	9	111.7
140	1265				950	946	9	111.9
140.2	1269				953	948	7	112.1
140.4	1271				956	951	8	112.3
140.6	1273				960	955	9	112.4
140.8	1276				963	958	8	112.6
141	1279				966	961	8	112.8
141.2	1282				969	964	8	113
141.4	1285				971	966	7	113.2
141.6	1288				974	969	8	113.4
141.8	1292				976	971	8	113.5
142	1293				979	974	7	113.7
142.2	1296				981	976	8	113.9
142.4	1298				984	979	8	114.1
142.6	1301				987	982	8	114.3
142.8	1304				990	985	8	114.4
143	1307				992	987	7	114.6
143.2	1310				994	989	8	114.8
143.4	1312				997	992	8	115
143.6	1314				999	994	8	115.1
143.8	1317				1002	997	8	115.3
144	1320				1004	999	8	115.5
144.2	1322				1007	1002	8	115.7
144.4	1325				1009	1004	9	115.8
144.6	1327				1012	1007	9	116
144.8	1330				1014	1010	8	116.2
145	1332				1018	1013	10	116.3
145.2	1334				1021	1016	11	116.5
145.4	1337				1025	1020	9	116.6
145.6	1341				1027	1022	8	116.8
145.8	1345				1029	1024	8	117
146	1348				1032	1027	9	117.2
146.2	1352				1035	1030	8	117.3
146.4	1355				1037	1032	8	117.5
146.6	1358				1039	1034	8	117.7
146.8	1361				1042	1037	8	117.9
147	1365				1045	1040	8	118.1
147.2	1368				1047	1042	9	118.2
147.4	1371				1051	1046	11	118.4
147.6	1375				1055	1050	8	118.6
147.8	1376				1057	1052	8	118.8
148	1378				1060	1055	8	119
148.2	1381				1063	1058	8	119.1
148.4	1384				1066	1061	8	119.3
148.6	1387				1068	1063	8	119.5
148.8	1389				1071	1066	8	119.7
149	1392				1074	1069	8	119.9
149.2	1393				1076	1071	8	120.1
149.4	1396				1078	1073	8	120.2
149.6	1400				1081	1076	8	120.4
149.8	1404				1084	1079	8	120.6
150	1407				1086	1081	8	120.8
150.2	1412				1089	1084	8	121
150.4	1415				1091	1086	8	121.1
150.6	1418				1094	1089	9	121.3
150.8	1421				1098	1093	10	121.5
151	1424				1101	1096	9	121.7
151.2	1426				1105	1100	8	121.9
151.4	1429				1108	1102	8	122
151.6	1432				1110	1105	8	122.2
151.8	1434				1112	1107	8	122.4
152	1437				1115	1110	8	122.6
152.2	1441				1117	1112	8	122.7
152.4	1444				1119	1114	8	122.9
152.6	1447				1122	1117	9	123.1
152.8	1449	1449	1441	22	1125	1120	9	123.3
153	1452	1451	1443	22	1128	1123	8	123.5
153.2		1453	1445	22	1131	1126	8	123.7
153.4		1456	1447	22	1133	1128	8	123.8
153.6		1459	1450	22	1136	1131	8	124
153.8		1462	1454	22	1138	1133	8	124.2
154		1464	1457	22	1141	1136	8	124.4
154.2		1467	1459	23	1143	1138	8	124.6
154.4		1470	1462	23	1146	1141	9	124.7
154.6		1472	1465	23	1149	1144	9	124.9
154.8		1475	1468	23	1152	1147	9	125.1
155		1478	1471	23	1155	1150	9	125.3
155.2		1480	1473	23	1158	1152	9	125.5
155.4		1483	1476	23	1160	1155	9	125.6
155.6		1485	1479	23	1163	1158	9	125.8
155.8		1488	1482	23	1166	1160	9	126
156		1491	1486	24	1168	1163	9	126.2
156.2		1494	1490	24	1171	1166	9	126.4
156.4		1497	1493	24	1174	1169	10	126.5
156.6		1500	1496	24	1178	1173	10	126.7
156.8		1502	1498	24	1181	1176	10	126.9
157		1504	1500	24	1184	1179	10	127.1
157.2		1507	1503	24	1188	1183	11	127.3
157.4		1509	1506	24	1191	1186	11	127.4
157.6		1512	1509	24	1195	1190	10	127.6
157.8		1515	1512	25	1198	1193	10	127.8
158		1518	1515	25	1201	1196	9	128
158.2		1520	1518	25	1204	1199	10	128.2
158.4		1523	1521	25	1207	1202	10	128.4
158.6		1524	1522	25	1210	1205	10	128.5
158.8		1527	1524	25	1213	1208	10	128.7
159		1529	1526	25	1216	1211	10	128.9
159.2		1532	1529	25	1219	1214	10	129.1
159.4		1535	1532	25	1222	1217	10	129.3
159.6		1539	1535	26	1225	1220	10	129.4
159.8		1543	1539	26	1228	1223	10	129.6
160		1546	1542	26	1231	1226	10	129.8
160.2		1549	1545	26	1234	1229	10	130
160.4		1551	1548	26	1237	1231	10	130.2
160.6		1554	1550	26	1239	1234	11	130.3
160.8		1557	1553	26	1242	1237	11	130.5
161		1559	1555	26	1246	1241	11	130.7
161.2		1562	1558	27	1249	1243	12	130.9
161.4		1565	1560	27	1252	1246	12	131.1
161.6		1568	1563	27	1255	1250	12	131.3
161.8		1570	1565	27	1258	1253	12	131.4
162		1573	1567	27	1261	1257	12	131.6
162.2		1575	1570	27	1264	1261	12	131.8
162.4		1578	1572	27	1267	1264	12	132
162.6		1581	1575	27	1270	1267	13	132.2
162.8		1585	1579	28	1273	1270	13	132.3
163		1589	1584	28	1277	1273	13	132.5
163.2		1594	1588	28	1280	1277	13	132.7
163.4		1598	1592	28	1283	1281	13	132.9
163.6		1602	1595	28	1286	1283	14	133.1
163.8		1606	1599	29	1289	1286	13	133.2
164		1609	1602	29	1292	1289	13	133.4
164.2		1612	1606	29	1295	1292	14	133.6
164.4		1616	1610	29	1298	1294	15	133.8
164.6		1620	1614	29	1301	1298	16	134
164.8		1623	1617	29	1305	1301	16	134.1
165		1627	1620	30	1309	1305	16	134.3
165.2		1631	1624	30	1312	1309	16	134.5
165.4		1634	1627	30	1316	1312	16	134.7
165.6		1638	1631	30	1319	1315	15	134.9
165.8		1642	1635	30	1322	1318	15	135.1
166		1645	1639	31	1324	1320	16	135.2
166.2		1649	1643	31	1328	1323	19	135.4
166.4		1652	1645	31	1332	1327	20	135.6
166.6		1655	1648	31	1336	1331	20	135.8
166.8		1658	1651	31	1340	1335	17	136
167		1661	1653	31	1343	1339	17	136.1
167.2		1664	1657	32	1346	1342	16	136.3
167.4		1668	1661	32	1349	1344	17	136.5
167.6		1672	1665	32	1352	1347	16	136.7
167.8		1676	1670	32	1354	1349	16	136.9
168		1680	1674	32	1357	1351	16	137.1
168.2		1685	1678	33	1359	1353	16	137.2
168.4		1689	1682	33	1361	1355	16	137.4
168.6		1693	1685	33	1364	1358	18	137.6
168.8		1696	1688	33	1368	1361	19	137.8
169		1699	1691	33	1371	1365	18	138
169.2		1701	1694	34	1374	1368	19	138.1
169.4		1703	1697	34	1378	1372	19	138.3
169.6		1706	1699	34	1381	1375	19	138.5
169.8		1708	1701	34	1385	1378	21	138.7
170		1710	1704	34	1389	1382	20	138.9
170.2		1713	1706	34	1392	1385	19	139
170.4		1715	1708	34	1395	1387	19	139.2
170.6		1718	1711	35	1398	1390	19	139.4
170.8		1722	1714	35	1401	1394	20	139.6
171		1725	1717	35	1404	1397	19	139.8
171.2		1728	1720	35	1407	1401	20	140
171.4		1731	1723	35	1411	1404	21	140.1
171.6		1734	1726	35	1414	1407	23	140.3
171.8		1737	1730	36	1418	1410	20	140.5
172		1740	1733	36	1421	1414	23	140.7
172.2		1742	1735	36	1424	1417	21	140.9
172.4		1745	1738	36	1427	1419	21	141
172.6		1749	1741	36	1430	1422	21	141.2
172.8		1752	1744	36	1433	1425	21	141.4
173		1755	1746	37	1436	1429	22	141.6
173.2		1758	1749	37	1439	1432	21	141.8
173.4		1763	1754	37	1441	1434	20	141.9
173.6		1767	1758	37	1444	1436	21	142.1
173.8		1770	1762	37	1447	1439	22	142.3
174		1773	1765	38	1449	1441	21	142.5
174.2		1777	1768	38	1452	1443	21	142.7
174.4		1780	1771	38	1454	1446	22	142.8
174.6		1783	1774	38	1457	1448	24	143
174.8		1786	1776	38	1460	1452	24	143.2
175		1789	1779	39	1463	1455	23	143.4
175.2		1793	1783	39	1466	1458	23	143.6
175.4		1795	1786	39	1469	1461	23	143.7
175.6		1798	1788	39	1471	1464	24	143.9
175.8		1801	1791	39	1474	1467	23	144.1
176		1804	1794	40	1477	1470	23	144.3
176.2		1807	1797	40	1480	1473	23	144.5
176.4		1810	1800	40	1482	1475	24	144.7
176.6		1813	1802	40	1485	1478	25	144.8
176.8		1817	1805	40	1488	1482	25	145
177		1820	1809	41	1491	1486	26	145.2
177.2		1823	1812	41	1494	1490	27	145.4
177.4		1827	1817	41	1497	1493	26	145.5
177.6		1830	1821	41	1500	1496	25	145.7
177.8		1834	1824	42	1502	1499	24	145.9
178		1837	1828	42	1505	1501	25	146.1
178.2		1840	1831	42	1507	1504	26	146.3
178.4		1845	1836	42	1510	1507	26	146.5
178.6		1847	1839	43	1513	1510	26	146.6
178.8		1850	1842	43	1516	1513	26	146.8
179		1852	1845	43	1519	1516	26	147
179.2		1855	1849	43	1522	1520	27	147.2
179.4		1858	1852	43	1524	1522	24	147.4
179.6		1860	1854	43	1526	1523	26	147.5
179.8		1863	1857	44	1528	1526	26	147.7
180		1865	1859	44	1531	1528	27	147.9
180.2		1868	1862	44	1534	1531	31	148.1
180.4		1871	1865	44	1538	1535	30	148.3
180.6		1874	1868	44	1542	1538	30	148.4
180.8		1877	1871	45	1546	1542	30	148.6
181		1880	1874	45	1549	1545	28	148.8
181.2		1882	1877	45	1551	1548	27	149
181.4		1885	1880	45	1554	1550	29	149.2
181.6		1888	1883	45	1557	1553	28	149.4
181.8		1892	1887	46	1560	1556	28	149.5
182		1896	1891	46	1563	1558	29	149.7
182.2		1900	1895	46	1566	1561	29	149.9
182.4		1903	1898	47	1568	1563	29	150.1
182.6		1906	1901	47	1571	1566	28	150.3
182.8		1909	1905	47	1574	1568	29	150.4
183		1913	1909	47	1577	1571	29	150.6
183.2		1917	1913	48	1580	1574	31	150.8
183.4		1921	1917	48	1583	1578	35	151
183.6		1924	1919	48	1588	1583	39	151.2
183.8		1927	1923	48	1593	1587	37	151.4
184		1931	1926	48	1597	1591	36	151.5
184.2		1933	1928	49	1601	1595	35	151.7
184.4		1935	1931	49	1605	1598	34	151.9
184.6		1939	1935	49	1609	1602	33	152.1
184.8		1942	1939	49	1612	1606	34	152.3
185		1946	1943	50	1616	1610	36	152.4
185.2		1949	1946	50	1620	1614	34	152.6
185.4		1953	1950	50	1624	1617	36	152.8
185.6		1957	1954	50	1628	1621	37	153
185.8		1961	1958	51	1632	1625	36	153.2
186		1964	1962	51	1635	1628	36	153.3
186.2		1967	1965	51	1639	1632	37	153.5
186.4		1969	1968	51	1643	1637	37	153.7
186.6		1973	1972	52	1647	1641	38	153.9
186.8		1976	1975	52	1650	1644	34	154.1
187		1979	1978	52	1654	1647	35	154.2
187.2		1982	1981	52	1657	1650	35	154.4
187.4		1986	1984	53	1660	1653	35	154.6
187.6		1989	1987	53	1663	1656	39	154.8
187.8		1993	1991	53	1667	1660	40	155
188		1997	1996	53	1671	1664	39	155.2
188.2		2002	2001	54	1675	1669	41	155.3
188.4		2006	2005	54	1680	1673	43	155.5
188.6		2009	2007	54	1685	1678	45	155.7
188.8		2013	2011	55	1689	1682	41	155.9
189		2016	2014	55	1693	1685	39	156.1
189.2		2020	2018	55	1696	1689	38	156.2
189.4		2023	2021	56	1699	1691	36	156.4
189.6		2026	2024	56	1701	1694	36	156.6
189.8		2029	2027	56	1704	1697	36	156.8
190		2031	2029	56	1706	1700	36	157
190.2		2033	2032	56	1709	1702	36	157.1
190.4		2036	2035	57	1711	1704	36	157.3
190.6		2039	2039	57	1714	1707	37	157.5
190.8		2043	2043	57	1717	1710	40	157.7
191		2046	2046	57	1720	1713	40	157.9
191.2		2050	2051	58	1723	1716	41	158.1
191.4		2053	2054	58	1727	1719	39	158.2
191.6		2056	2059	58	1730	1722	39	158.4
191.8		2060	2062	59	1733	1725	41	158.6
192		2063	2065	59	1736	1729	41	158.8
192.2		2066	2068	59	1739	1732	40	159
192.4		2068	2070	59	1742	1735	39	159.1
192.6		2072	2073	59	1745	1737	43	159.3
192.8		2075	2076	60	1749	1741	43	159.5
193		2078	2079	60	1753	1744	41	159.7
193.2		2081	2083	60	1755	1747	41	159.9
193.4		2085	2088	61	1759	1750	46	160
193.6		2088	2091	61	1764	1755	46	160.2
193.8		2091	2094	61	1767	1759	44	160.4
194		2095	2098	61	1771	1763	44	160.6
194.2		2099	2101	62	1774	1766	45	160.8
194.4		2102	2104	62	1778	1769	43	160.9
194.6		2107	2108	62	1781	1772	43	161.1
194.8		2111	2113	63	1784	1775	44	161.3
195		2114	2116	63	1788	1778	44	161.5
195.2		2117	2119	63	1791	1782	45	161.7
195.4		2121	2123	63	1794	1785	43	161.9
195.6		2124	2125	64	1797	1788	43	162
195.8		2126	2128	64	1800	1791	44	162.2
196		2129	2130	64	1804	1794	46	162.4
196.2		2133	2134	64	1807	1797	45	162.6
196.4		2138	2138	65	1810	1800	45	162.8
196.6		2141	2141	65	1814	1803	46	162.9
196.8		2144	2143	65	1817	1806	47	163.1
197		2146	2146	65	1821	1809	48	163.3
197.2		2149	2149	65	1824	1813	48	163.5
197.4		2152	2152	66	1828	1818	48	163.7
197.6		2155	2155	66	1832	1822	48	163.8
197.8		2159	2158	66	1835	1826	49	164
198		2162	2161	67	1839	1830	48	164.2
198.2		2166	2164	67	1843	1834	52	164.4
198.4		2169	2168	67	1846	1838	45	164.6
198.6		2173	2171	67	1849	1841	47	164.8
198.8		2176	2175	68	1852	1844	47	164.9
199		2179	2179	68	1855	1848	48	165.1
199.2		2183	2182	68	1858	1851	46	165.3
199.4		2186	2186	68	1860	1854	47	165.5
199.6		2189	2189	69	1863	1857	48	165.7
199.8		2193	2192	69	1866	1859	48	165.8
200		2197	2196	69	1869	1862	49	166
200.2		2199	2198	69	1872	1865	49	166.2
200.4		2202	2201	70	1875	1868	50	166.4
200.6		2206	2205	70	1878	1872	50	166.6
200.8		2208	2208	70	1881	1875	48	166.7
201		2212	2211	70	1883	1878	49	166.9
201.2		2215	2214	71	1886	1881	51	167.1
201.4		2219	2218	71	1890	1885	54	167.3
201.6		2222	2220	71	1894	1889	56	167.5
201.8		2225	2224	71	1899	1893	55	167.6
202		2229	2227	72	1902	1897	51	167.8
202.2		2232	2230	72	1905	1900	51	168
202.4		2235	2233	72	1908	1903	53	168.2
202.6		2238	2236	72	1912	1908	56	168.4
202.8		2241	2239	73	1916	1912	56	168.5
203		2244	2243	73	1920	1916	54	168.7
203.2		2247	2245	73	1923	1919	53	168.9
203.4		2250	2248	73	1927	1923	56	169.1
203.6		2254	2251	73	1931	1926	53	169.3
203.8		2257	2254	74	1933	1929	51	169.4
204		2260	2257	74	1936	1931	54	169.6
204.2		2264	2261	74	1939	1936	56	169.8
204.4		2267	2264	75	1943	1940	57	170
204.6		2271	2268	75	1947	1944	56	170.2
204.8		2274	2271	75	1951	1948	59	170.3
205		2277	2274	75	1955	1952	58	170.5
205.2		2281	2277	75	1959	1956	61	170.7
205.4		2285	2281	76	1963	1960	56	170.9
205.6		2288	2284	76	1966	1964	54	171.1
205.8		2292	2288	76	1969	1967	55	171.3
206		2296	2291	77	1972	1971	58	171.4
206.2		2299	2295	77	1975	1975	57	171.6
206.4		2302	2298	77	1978	1977	57	171.8
206.6		2305	2301	77	1982	1981	59	172
206.8		2308	2304	77	1985	1984	59	172.2
207		2311	2306	78	1989	1987	60	172.3
207.2		2314	2309	78	1993	1991	62	172.5
207.4		2316	2311	78	1997	1996	66	172.7
207.6		2320	2315	78	2003	2002	64	172.9
207.8		2324	2318	79	2007	2005	59	173.1
208		2327	2321	79	2010	2008	61	173.2
208.2		2331	2324	79	2014	2012	63	173.4
208.4		2334	2327	79	2018	2016	63	173.6
208.6		2337	2330	79	2021	2019	60	173.8
208.8		2340	2334	80	2025	2022	61	174
209		2345	2338	80	2028	2026	59	174.1
209.2		2349	2341	80	2030	2028	58	174.3
209.4		2352	2344	80	2032	2031	59	174.5
209.6		2356	2347	81	2035	2034	62	174.7
209.8		2358	2350	81	2039	2038	63	174.9
210		2362	2354	81	2042	2042	64	175
210.2		2366	2359	81	2046	2046	63	175.2
210.4		2370	2364	82	2050	2051	64	175.4
210.6		2373	2366	82	2053	2054	63	175.6
210.8		2376	2369	82	2057	2059	65	175.8
211		2380	2373	82	2060	2063	64	176
211.2		2385	2378	83	2063	2066	63	176.1
211.4		2388	2381	83	2066	2068	63	176.3
211.6		2392	2384	83	2069	2071	64	176.5
211.8		2395	2388	83	2073	2074	64	176.7
212		2399	2392	83	2076	2077	64	176.8
212.2		2402	2395	84	2079	2080	65	177
212.4		2405	2398	84	2083	2085	71	177.2
212.6		2410	2402	84	2087	2090	65	177.4
212.8		2413	2406	84	2090	2093	66	177.6
213		2417	2409	84	2094	2096	69	177.8
213.2		2420	2412	85	2098	2100	69	177.9
213.4		2425	2418	85	2102	2104	67	178.1
213.6		2428	2421	85	2106	2108	72	178.3
213.8		2431	2423	85	2111	2112	69	178.5
214		2434	2426	85	2114	2116	67	178.7
214.2		2438	2430	86	2117	2119	68	178.8
214.4		2441	2432	86	2121	2123	69	179
214.6		2444	2436	86	2124	2126	67	179.2
214.8		2448	2439	86	2127	2128	68	179.4
215		2451	2443	86	2130	2131	71	179.6
215.2		2455	2447	87	2135	2135	73	179.8
215.4		2458	2450	87	2139	2139	70	179.9
215.6		2460	2453	87	2142	2142	67	180.1
215.8		2463	2455	87	2145	2145	67	180.3
216		2467	2458	87	2147	2147	69	180.5
216.2		2471	2462	88	2151	2151	71	180.7
216.4		2474	2465	88	2154	2154	70	180.8
216.6		2477	2468	88	2158	2157	72	181
216.8		2480	2471	88	2162	2161	72	181.2
217		2484	2475	88	2165	2164	72	181.4
217.2		2487	2479	89	2169	2167	72	181.6
217.4		2491	2483	89	2173	2171	72	181.7
217.6		2494	2486	89	2176	2175	72	181.9
217.8		2498	2489	89	2179	2179	73	182.1
218		2501	2492	89	2183	2183	73	182.3
218.2		2504	2495	89	2187	2186	73	182.5
218.4		2508	2499	90	2190	2189	74	182.6
218.6		2511	2503	90	2194	2193	74	182.8
218.8		2515	2507	90	2197	2196	72	183
219		2519	2511	90	2200	2199	73	183.2
219.2		2524	2516	90	2204	2203	74	183.4
219.4		2527	2519	91	2207	2206	73	183.5
219.6		2531	2523	91	2210	2210	76	183.7
219.8		2535	2526	91	2214	2213	75	183.9
220		2538	2529	91	2218	2217	75	184.1
220.2		2541	2533	91	2221	2220	75	184.3
220.4		2544	2535	91	2225	2223	76	184.4
220.6		2547	2539	92	2228	2226	76	184.6
220.8		2550	2542	92	2232	2230	76	184.8
221		2553	2545	92	2235	2233	75	185
221.2		2556	2548	92	2238	2236	76	185.2
221.4		2560	2551	92	2241	2240	76	185.4
221.6		2564	2555	92	2245	2243	76	185.5
221.8		2568	2559	92	2248	2246	76	185.7
222		2573	2564	93	2251	2249	77	185.9
222.2		2576	2567	93	2255	2252	77	186.1
222.4		2580	2571	93	2258	2255	78	186.3
222.6		2586	2577	93	2262	2259	79	186.4
222.8		2591	2581	93	2266	2263	79	186.6
223		2594	2584	94	2270	2267	80	186.8
223.2		2597	2587	94	2273	2271	78	187
223.4		2601	2591	94	2277	2274	79	187.2
223.6		2605	2594	94	2280	2277	80	187.3
223.8		2608	2598	94	2285	2281	82	187.5
224		2611	2602	94	2288	2284	80	187.7
224.2		2615	2605	94	2292	2288	81	187.9
224.4		2618	2608	94	2296	2292	80	188.1
224.6		2623	2612	95	2299	2295	79	188.3
224.8		2628	2617	95	2302	2298	80	188.4
225		2632	2621	95	2306	2302	80	188.6
225.2		2636	2625	95	2309	2305	80	188.8
225.4		2640	2629	95	2312	2307	79	189
225.6		2645	2634	95	2315	2310	80	189.2
225.8		2650	2638	96	2319	2313	83	189.3
226		2654	2642	96	2322	2316	82	189.5
226.2		2658	2646	96	2326	2320	82	189.7
226.4		2661	2649	96	2330	2323	82	189.9
226.6		2665	2653	96	2333	2327	81	190.1
226.8		2670	2658	96	2336	2330	82	190.3
227		2673	2661	96	2340	2333	84	190.4
227.2		2677	2665	97	2345	2337	86	190.6
227.4		2683	2671	97	2349	2341	84	190.8
227.6		2689	2676	97	2353	2345	83	191
227.8		2693	2680	97	2356	2348	83	191.2
228		2697	2684	97	2359	2351	83	191.3
228.2		2700	2688	97	2363	2355	85	191.5
228.4		2704	2691	97	2367	2360	88	191.7
228.6		2707	2695	97	2372	2365	83	191.9
228.8		2711	2698	98	2375	2368	84	192.1
229		2716	2703	98	2378	2371	85	192.2
229.2		2719	2706	98	2383	2376	89	192.4
229.4		2722	2709	98	2387	2380	84	192.6
229.6		2727	2714	98	2391	2383	85	192.8
229.8		2731	2718	98	2394	2387	86	193
230		2735	2722	98	2398	2391	86	193.2
230.2		2739	2726	98	2401	2394	85	193.3
230.4		2744	2731	98	2405	2398	87	193.5
230.6		2748	2735	99	2410	2402	88	193.7
230.8		2752	2738	99	2414	2406	87	193.9
231		2755	2742	99	2418	2410	86	194.1
231.2		2759	2746	99	2421	2413	89	194.2
231.4		2763	2750	99	2426	2418	87	194.4
231.6		2767	2754	99	2429	2422	86	194.6
231.8		2771	2758	99	2432	2424	86	194.8
232		2776	2762	99	2435	2428	88	195
232.2		2778	2765	99	2439	2431	87	195.1
232.4		2781	2768	99	2443	2434	88	195.3
232.6		2785	2772	99	2446	2438	88	195.5
232.8		2789	2776	99	2450	2441	88	195.7
233		2793	2780	99	2454	2445	88	195.9
233.2		2798	2785	99	2457	2449	88	196.1
233.4		2802	2788	100	2460	2452	87	196.2
233.6		2806	2792	100	2463	2455	88	196.4
233.8		2808	2795	100	2467	2458	89	196.6
234		2814	2800	100	2470	2462	89	196.8
234.2		2818	2805	100	2474	2465	89	197
234.4		2823	2810	100	2477	2468	89	197.1
234.6		2826	2813	100	2481	2471	90	197.3
234.8		2829	2816	100	2485	2476	90	197.5
235		2835	2821	100	2488	2480	90	197.7
235.2		2838	2824	100	2492	2484	90	197.9
235.4		2843	2828	100	2496	2487	91	198.1
235.6		2847	2833	100	2499	2491	90	198.2
235.8		2852	2839	100	2503	2494	90	198.4
236		2856	2843	100	2507	2498	92	198.6
236.2		2861	2847	100	2511	2502	91	198.8
236.4		2865	2851	100	2515	2507	92	198.9
236.6		2869	2855	100	2519	2511	93	199.1
236.8		2874	2860	100	2524	2516	92	199.3
237		2878	2864	100	2527	2519	92	199.5
237.2		2883	2869	100	2532	2524	92	199.7
237.4		2886	2873	100	2535	2527	91	199.9
237.6		2891	2877	100	2539	2530	92	200
237.8		2895	2881	100	2542	2534	91	200.2
238		2898	2884	100	2545	2537	92	200.4
238.2		2902	2888	101	2549	2541	92	200.6
238.4		2907	2893	101	2552	2544	91	200.8
238.6		2911	2897	101	2555	2547	92	200.9
238.8		2914	2900	101	2559	2551	93	201.1
239		2917	2904	101	2563	2554	93	201.3
239.2		2922	2908	101	2568	2558	94	201.5
239.4		2926	2912	101	2573	2563	94	201.7
239.6		2930	2915	101	2576	2567	93	201.9
239.8		2935	2920	101	2580	2572	96	202
240		2939	2925	101	2586	2577	97	202.2
240.2		2944	2931	101	2591	2582	94	202.4
240.4		2948	2934	101	2595	2585	93	202.6
240.6		2955	2941	101	2598	2588	94	202.8
240.8		2959	2944	101	2602	2592	94	202.9
241		2964	2950	101	2606	2596	94	203.1
241.2		2968	2954	101	2610	2600	94	203.3
241.4		2971	2958	101	2613	2604	94	203.5
241.6		2978	2965	101	2617	2607	94	203.7
241.8		2983	2969	101	2622	2611	96	203.9
242		2987	2973	101	2627	2616	96	204
242.2		2990	2977	101	2631	2620	95	204.2
242.4		2994	2981	101	2635	2624	95	204.4
242.6		2998	2985	101	2640	2629	96	204.6
242.8		3002	2989	100	2645	2634	97	204.8
243		3007	2995	100	2650	2638	96	204.9
243.2		3013	3000	100	2654	2643	96	205.1
243.4		3018	3005	100	2659	2646	95	205.3
243.6		3023	3009	100	2662	2650	96	205.5
243.8		3026	3013	100	2667	2655	96	205.7
244		3031	3018	100	2671	2659	95	205.8
244.2		3036	3023	100	2675	2663	96	206
244.4		3040	3026	100	2680	2668	101	206.2
244.6		3044	3030	100	2686	2673	99	206.4
244.8		3048	3034	100	2691	2678	97	206.6
245		3052	3038	100	2695	2682	96	206.8
245.2		3057	3042	100	2699	2687	96	206.9
245.4		3061	3047	100	2703	2690	96	207.1
245.6		3065	3051	100	2706	2694	96	207.3
245.8		3068	3054	100	2710	2698	97	207.5
246		3073	3059	100	2715	2702	97	207.7
246.2		3077	3063	100	2719	2706	96	207.8
246.4		3081	3066	100	2723	2709	97	208
246.6		3087	3072	100	2728	2715	97	208.2
246.8		3092	3077	100	2732	2719	97	208.4
247		3096	3081	99	2736	2723	97	208.6
247.2		3101	3086	99	2740	2727	98	208.7
247.4		3106	3091	99	2745	2732	98	208.9
247.6		3110	3095	99	2749	2736	96	209.1
247.8		3116	3099	99	2753	2740	97	209.3
248		3120	3104	99	2757	2744	96	209.5
248.2		3125	3109	99	2761	2748	97	209.6
248.4		3130	3114	99	2765	2752	97	209.8
248.6		3134	3118	99	2770	2757	98	210
248.8		3139	3122	99	2774	2761	97	210.2
249		3145	3128	99	2778	2764	96	210.4
249.2		3152	3135	98	2781	2767	96	210.6
249.4		3156	3141	98	2785	2771	97	210.7
249.6		3161	3145	98	2789	2775	97	210.9
249.8		3165	3149	98	2793	2780	97	211.1
250		3169	3153	98	2798	2785	97	211.3
250.2		3173	3157	98	2802	2789	97	211.5
250.4		3177	3161	98	2806	2792	96	211.6
250.6		3182	3166	98	2810	2796	98	211.8
250.8		3186	3171	98	2815	2801	98	212
251		3191	3175	98	2820	2807	97	212.2
251.2		3194	3178	97	2824	2811	96	212.4
251.4		3199	3183	97	2828	2814	96	212.5
251.6		3202	3185	97	2832	2819	98	212.7
251.8		3207	3191	97	2837	2823	96	212.9
252		3213	3197	97	2841	2827	97	213.1
252.2		3218	3203	97	2846	2832	97	213.3
252.4		3222	3206	97	2851	2837	97	213.5
252.6		3226	3210	97	2855	2842	97	213.6
252.8		3231	3215	97	2860	2846	97	213.8
253		3236	3219	97	2864	2850	97	214
253.2		3241	3226	96	2869	2855	97	214.2
253.4		3247	3232	96	2874	2860	97	214.4
253.6		3251	3236	96	2878	2864	97	214.5
253.8		3256	3241	96	2883	2870	96	214.7
254		3260	3245	96	2887	2873	96	214.9
254.2		3265	3250	96	2891	2878	96	215.1
254.4		3271	3256	96	2895	2881	96	215.3
254.6		3276	3262	95	2899	2885	96	215.4
254.8		3282	3267	95	2904	2889	97	215.6
255		3286	3271	95	2908	2894	96	215.8
255.2		3290	3275	95	2912	2899	96	216
255.4		3295	3279	95	2916	2902	96	216.2
255.6		3298	3283	95	2920	2906	96	216.4
255.8		3303	3288	95	2924	2910	96	216.5
256		3307	3293	95	2928	2914	96	216.7
256.2		3313	3299	94	2933	2919	97	216.9
256.4		3318	3303	94	2938	2924	96	217.1
256.6		3323	3308	94	2944	2930	96	217.3
256.8		3327	3312	94	2948	2934	97	217.4
257		3331	3317	94	2954	2940	97	217.6
257.2		3335	3321	94	2959	2944	96	217.8
257.4		3339	3325	94	2964	2950	96	218
257.6		3343	3328	94	2968	2954	95	218.2
257.8		3347	3333	93	2973	2959	97	218.4
258		3351	3336	93	2979	2966	96	218.5
258.2		3356	3341	93	2984	2971	95	218.7
258.4		3362	3348	93	2988	2975	95	218.9
258.6		3367	3353	93	2992	2978	95	219.1
258.8		3372	3358	93	2996	2983	95	219.3
259		3377	3363	92	3000	2988	95	219.5
259.2		3382	3367	92	3005	2993	96	219.6
259.4		3387	3372	92	3011	2998	96	219.8
259.6		3392	3378	92	3017	3004	95	220
259.8		3398	3384	92	3022	3008	94	220.2
260		3402	3388	92	3026	3012	94	220.3
260.2		3407	3392	91	3030	3017	94	220.5
260.4		3411	3396	91	3035	3022	94	220.7
260.6		3415	3400	91	3040	3026	94	220.9
260.8		3419	3404	91	3044	3030	94	221.1
261		3425	3410	91	3048	3034	93	221.2
261.2		3430	3415	91	3053	3039	93	221.4
261.4		3434	3419	91	3057	3043	93	221.6
261.6		3439	3424	90	3062	3048	93	221.8
261.8		3444	3428	90	3066	3052	93	222
262		3450	3434	90	3070	3056	93	222.2
262.2		3456	3442	90	3075	3060	93	222.3
262.4		3462	3447	90	3079	3064	92	222.5
262.6		3469	3453	89	3084	3069	93	222.7
262.8		3473	3457	89	3090	3075	92	222.9
263		3478	3462	89	3095	3080	92	223.1
263.2		3484	3468	89	3100	3085	92	223.3
263.4		3489	3474	89	3105	3090	92	223.4
263.6		3494	3479	89	3110	3094	91	223.6
263.8		3499	3483	88	3115	3099	91	223.8
264		3503	3487	88	3120	3104	91	224
264.2		3507	3491	88	3125	3110	91	224.2
264.4		3513	3498	88	3131	3115	91	224.3
264.6		3520	3505	88	3135	3119	90	224.5
264.8		3525	3509	88	3140	3124	91	224.7
265		3530	3513	88	3147	3130	92	224.9
265.2		3534	3518	87	3153	3137	90	225.1
265.4		3539	3523	87	3158	3143	90	225.2
265.6		3545	3529	87	3163	3147	90	225.4
265.8		3549	3534	87	3167	3151	89	225.6
266		3556	3540	87	3171	3155	89	225.8
266.2		3561	3545	87	3176	3159	89	226
266.4		3565	3549	87	3181	3164	89	226.2
266.6		3571	3556	86	3185	3170	89	226.3
266.8		3577	3562	86	3190	3174	89	226.5
267		3585	3569	86	3194	3178	88	226.7
267.2		3592	3575	86	3198	3182	88	226.9
267.4		3597	3580	86	3202	3185	88	227.1
267.6		3604	3588	86	3208	3191	88	227.3
267.8		3610	3595	85	3214	3198	88	227.4
268		3616	3600	85	3219	3203	87	227.6
268.2		3621	3604	85	3223	3207	87	227.8
268.4		3626	3609	85	3227	3211	87	228
268.6		3629	3613	85	3233	3216	87	228.2
268.8		3635	3620	85	3238	3222	87	228.3
269		3641	3625	85	3244	3229	86	228.5
269.2		3648	3631	84	3249	3234	86	228.7
269.4		3652	3635	84	3254	3239	86	228.9
269.6		3658	3641	84	3259	3243	86	229.1
269.8		3663	3647	84	3264	3248	85	229.2
270		3669	3653	84	3269	3254	85	229.4
270.2		3676	3660	84	3275	3261	85	229.6
270.4		3683	3667	84	3281	3266	84	229.8
270.6		3690	3674	83	3286	3271	84	230
270.8		3696	3682	83	3290	3275	84	230.2
271		3702	3687	83	3295	3279	84	230.3
271.2		3707	3692	83	3299	3284	84	230.5
271.4		3714	3699	83	3303	3289	83	230.7
271.6		3721	3706	83	3308	3294	83	230.9
271.8		3726	3712	83	3314	3300	83	231.1
272		3731	3717	83	3319	3304	82	231.3
272.2		3736	3722	82	3325	3310	82	231.4
272.4		3743	3728	82	3329	3314	83	231.6
272.6		3749	3734	82	3333	3319	82	231.8
272.8		3754	3741	82	3337	3323	82	232
273		3760	3746	82	3341	3327	82	232.2
273.2		3765	3751	82	3346	3331	81	232.3
273.4		3770	3756	82	3350	3336	81	232.5
273.6		3776	3762	82	3355	3340	80	232.7
273.8		3782	3768	82	3361	3347	80	232.9
274		3787	3774	82	3366	3352	80	233.1
274.2		3792	3778	82	3372	3358	79	233.2
274.4		3797	3783	81	3377	3362	79	233.4
274.6		3803	3789	81	3383	3368	79	233.6
274.8		3808	3795	81	3388	3373	79	233.8
275		3815	3803	81	3393	3379	78	234
275.2		3822	3809	81	3399	3385	78	234.2
275.4		3827	3814	81	3404	3389	78	234.3
275.6		3832	3819	81	3408	3393	78	234.5
275.8		3836	3824	81	3413	3398	78	234.7
276		3842	3831	81	3417	3402	78	234.9
276.2		3849	3837	81	3422	3408	77	235.1
276.4		3854	3842	81	3428	3413	77	235.2
276.6		3860	3847	81	3433	3418	77	235.4
276.8		3866	3853	81	3438	3422	76	235.6
277		3872	3860	81	3443	3427	76	235.8
277.2		3879	3866	81	3449	3433	76	236
277.4		3885	3872	81	3456	3441	76	236.2
277.6		3891	3878	81	3462	3447	75	236.3
277.8		3897	3884	80	3469	3453	74	236.5
278		3902	3891	80	3474	3458	74	236.7
278.2		3908	3897	80	3479	3463	74	236.9
278.4		3915	3903	80	3485	3469	74	237.1
278.6		3921	3910	80	3490	3475	73	237.2
278.8		3929	3920	80	3496	3480	74	237.4
279		3937	3928	80	3500	3484	74	237.6
279.2		3944	3935	80	3505	3488	73	237.8
279.4		3949	3941	80	3510	3494	72	238
279.6		3954	3947	80	3517	3502	73	238.2
279.8		3960	3953	80	3523	3507	72	238.3
280		3966	3959	80	3528	3512	72	238.5
280.2		3972	3964	80	3533	3516	72	238.7
280.4		3977	3969	80	3538	3522	71	238.9
280.6		3985	3978	80	3544	3528	71	239.1
280.8		3991	3985	80	3549	3534	70	239.2
281		3996	3990	80	3555	3540	70	239.4
281.2		4002	3994	80	3561	3545	70	239.6
281.4		4007	4000	80	3566	3550	70	239.8
281.6		4012	4005	80	3572	3557	69	240
281.8		4018	4012	80	3579	3563	70	240.1
282		4023	4017	80	3587	3570	69	240.3
282.2		4029	4022	80	3593	3576	68	240.5
282.4		4036	4028	80	3599	3582	69	240.7
282.6		4042	4035	80	3606	3590	68	240.9
282.8		4048	4041	80	3613	3597	68	241
283		4055	4048	80	3618	3602	68	241.2
283.2		4063	4055	80	3623	3607	68	241.4
283.4		4069	4061	80	3628	3611	69	241.6
283.6		4076	4070	80	3633	3617	67	241.8
283.8		4082	4075	80	3639	3624	66	242
284		4089	4082	80	3646	3630	66	242.1
284.2		4095	4087	80	3651	3635	66	242.3
284.4		4102	4094	80	3657	3640	66	242.5
284.6		4108	4101	80	3662	3646	66	242.7
284.8		4115	4107	80	3669	3653	66	242.9
285		4121	4113	80	3676	3660	66	243
285.2		4128	4120	80	3684	3668	65	243.2
285.4		4134	4127	80	3690	3675	65	243.4
285.6		4140	4132	80	3697	3682	64	243.6
285.8		4146	4139	80	3703	3688	64	243.8
286		4152	4144	80	3709	3694	64	243.9
286.2		4158	4149	80	3716	3700	64	244.1
286.4		4163	4155	80	3722	3708	64	244.3
286.6		4170	4163	80	3728	3714	64	244.5
286.8		4176	4168	80	3733	3719	63	244.7
287		4182	4174	80	3739	3725	63	244.8
287.2		4189	4180	80	3746	3731	63	245
287.4		4195	4186	80	3752	3738	63	245.2
287.6		4200	4192	80	3758	3744	63	245.4
287.8		4206	4197	80	3764	3750	63	245.6
288		4211	4203	80	3769	3754	63	245.8
288.2		4216	4207	80	3775	3761	63	245.9
288.4		4222	4213	80	3781	3767	63	246.1
288.6		4228	4220	80	3786	3773	63	246.3
288.8		4234	4226	80	3791	3778	63	246.5
289		4239	4231	80	3797	3783	62	246.7
289.2		4246	4237	80	3803	3790	62	246.8
289.4		4251	4243	80	3809	3796	62	247
289.6		4256	4248	80	3817	3804	62	247.2
289.8		4261	4254	80	3823	3810	62	247.4
290		4269	4261	80	3829	3816	63	247.6
290.2		4277	4269	80	3833	3820	62	247.7
290.4		4283	4275	80	3839	3827	61	247.9
290.6		4291	4283	80	3845	3834	62	248.1
290.8		4297	4288	80	3852	3840	61	248.3
291		4303	4294	80	3857	3845	61	248.5
291.2		4309	4298	80	3864	3851	61	248.7
291.4		4314	4304	80	3871	3858	61	248.8
291.6		4320	4311	80	3878	3865	62	249
291.8		4327	4317	80	3884	3871	61	249.2
292		4334	4324	80	3891	3877	61	249.4
292.2		4340	4329	80	3897	3884	61	249.6
292.4		4345	4335	80	3903	3891	61	249.7
292.6		4351	4341	80	3909	3897	61	249.9
292.8		4356	4347	80	3916	3904	61	250.1
293		4362	4352	80	3923	3912	62	250.3
293.2		4369	4357	80	3931	3922	64	250.5
293.4		4375	4364	80	3939	3931	61	250.7
293.6		4383	4371	80	3946	3937	61	250.9
293.8		4387	4375	80	3951	3943	61	251
294		4394	4381	79	3957	3950	61	251.2
294.2		4401	4389	79	3964	3956	61	251.4
294.4		4408	4397	79	3970	3962	61	251.6
294.6		4414	4403	79	3975	3967	61	251.8
294.8		4419	4408	79	3983	3976	62	251.9
295		4425	4412	79	3990	3984	61	252.1
295.2		4430	4417	79	3996	3989	61	252.3
295.4		4436	4422	79	4001	3994	61	252.5
295.6		4442	4428	79	4007	4000	61	252.7
295.8		4448	4434	79	4013	4006	61	252.9
296		4454	4439	79	4019	4013	61	253.1
296.2		4461	4444	79	4024	4018	61	253.2
296.4		4467	4451	79	4031	4024	61	253.4
296.6		4474	4458	79	4038	4030	61	253.6
296.8		4481	4464	79	4044	4038	61	253.8
297		4486	4470	79	4051	4045	61	254
297.2		4492	4475	79	4059	4052	64	254.1
297.4		4497	4480	79	4066	4058	61	254.3
297.6		4502	4485	79	4074	4067	63	254.5
297.8		4508	4492	79	4081	4074	61	254.7
298		4513	4497	79	4088	4080	62	254.9
298.2		4519	4502	79	4094	4086	61	255.1
298.4		4525	4508	79	4101	4093	62	255.3
298.6		4532	4515	79	4108	4101	61	255.4
298.8		4539	4523	79	4115	4107	61	255.6
299		4545	4529	79	4121	4113	62	255.8
299.2		4551	4534	79	4129	4121	62	256
299.4		4556	4539	79	4135	4128	61	256.2
299.6		4561	4545	79	4142	4134	62	256.4
299.8		4568	4552	79	4149	4141	61	256.5
300		4574	4557	79	4155	4146	61	256.7
300.2		4579	4563	79	4161	4152	61	256.9
300.4		4585	4568	79	4167	4160	62	257.1
300.6		4592	4576	79	4174	4166	61	257.3
300.8		4600	4584	79	4180	4172	61	257.5
301		4606	4590	78	4187	4178	61	257.6
301.2		4613	4597	78	4193	4185	61	257.8
301.4		4619	4603	78	4199	4192	61	258
301.6		4624	4609	78	4205	4197	61	258.2
301.8		4629	4614	78	4211	4203	61	258.4
302		4634	4619	78	4217	4208	61	258.6
302.2		4641	4625	78	4223	4214	61	258.7
302.4		4646	4630	78	4229	4221	61	258.9
302.6		4651	4636	78	4236	4227	61	259.1
302.8		4657	4642	78	4242	4233	62	259.3
303		4663	4647	78	4248	4240	61	259.5
303.2		4668	4651	78	4254	4246	62	259.7
303.4		4674	4656	78	4259	4252	61	259.8
303.6		4680	4661	78	4267	4259	64	260
303.8		4688	4671	78	4275	4267	63	260.2
304		4695	4677	78	4282	4274	61	260.4
304.2		4700	4682	78	4290	4282	62	260.6
304.4		4706	4687	78	4297	4288	61	260.8
304.6		4712	4693	78	4303	4293	61	260.9
304.8		4718	4699	78	4308	4298	61	261.1
305		4724	4705	78	4315	4305	61	261.3
305.2		4729	4710	78	4321	4311	61	261.5
305.4		4735	4716	78	4328	4318	62	261.7
305.6		4741	4721	78	4335	4325	61	261.9
305.8		4746	4727	78	4341	4331	61	262
306		4752	4732	78	4347	4337	61	262.2
306.2		4757	4738	78	4353	4343	61	262.4
306.4		4763	4743	78	4359	4349	61	262.6
306.6		4768	4748	78	4365	4355	61	262.8
306.8		4775	4755	77	4372	4361	61	263
307		4781	4761	77	4380	4368	62	263.1
307.2		4786	4766	77	4386	4374	62	263.3
307.4		4792	4772	77	4392	4379	61	263.5
307.6		4799	4778	77	4400	4387	63	263.7
307.8		4805	4785	77	4407	4395	61	263.9
308		4811	4790	77	4413	4402	61	264.1
308.2		4817	4796	77	4419	4407	61	264.2
308.4		4822	4801	77	4424	4412	60	264.4
308.6		4828	4807	77	4431	4417	60	264.6
308.8		4834	4813	77	4437	4423	60	264.8
309		4841	4820	77	4443	4429	60	265
309.2		4848	4827	77	4449	4435	60	265.2
309.4		4854	4832	77	4456	4440	60	265.3
309.6		4860	4838	77	4463	4446	60	265.5
309.8		4866	4844	77	4470	4453	60	265.7
310		4871	4849	77	4477	4461	60	265.9
310.2		4877	4856	77	4483	4467	60	266.1
310.4		4884	4862	77	4489	4472	60	266.3
310.6		4889	4867	77	4494	4477	60	266.4
310.8		4893	4871	77	4500	4483	60	266.6
311		4900	4879	77	4506	4489	59	266.8
311.2		4906	4886	77	4512	4495	59	267
311.4		4913	4892	77	4518	4501	59	267.2
311.6		4920	4899	77	4524	4506	59	267.4
311.8		4926	4906	77	4531	4514	60	267.5
312		4933	4913	77	4538	4522	59	267.7
312.2		4940	4920	77	4545	4528	59	267.9
312.4		4947	4927	77	4551	4534	59	268.1
312.6		4954	4934	77	4556	4539	59	268.3
312.8		4960	4941	77	4562	4546	59	268.5
313		4966	4947	77	4568	4553	58	268.6
313.2		4973	4954	77	4575	4558	58	268.8
313.4		4980	4961	77	4580	4564	59	269
313.6		4986	4968	77	4587	4570	59	269.2
313.8		4992	4974	77	4595	4579	59	269.4
314		4997	4979	77	4602	4587	58	269.6
314.2		5005	4986	77	4609	4593	59	269.7
314.4		5012	4993	77	4616	4600	58	269.9
314.6		5018	5000	77	4621	4606	59	270.1
314.8		5024	5005	77	4626	4612	59	270.3
315		5029	5011	77	4632	4617	58	270.5
315.2		5036	5016	77	4639	4623	58	270.7
315.4		5041	5022	77	4644	4629	58	270.8
315.6		5047	5029	77	4650	4634	58	271
315.8		5054	5036	77	4656	4641	57	271.2
316		5060	5041	77	4662	4646	57	271.4
316.2		5066	5047	77	4668	4651	57	271.6
316.4		5072	5053	77	4674	4656	57	271.8
316.6		5078	5060	77	4680	4662	58	271.9
316.8		5086	5067	77	4689	4671	59	272.1
317		5093	5073	77	4696	4677	57	272.3
317.2		5098	5078	77	4701	4682	57	272.5
317.4		5105	5086	77	4707	4687	57	272.7
317.6		5110	5091	77	4713	4694	57	272.9
317.8		5119	5099	77	4719	4701	56	273
318		5126	5105	77	4725	4706	57	273.2
318.2		5132	5111	77	4731	4712	56	273.4
318.4		5137	5117	77	4737	4717	57	273.6
318.6		5143	5123	78	4743	4723	56	273.8
318.8		5148	5127	78	4748	4729	57	274
319		5155	5134	78	4754	4735	56	274.1
319.2		5163	5141	78	4760	4740	56	274.3
319.4		5170	5149	78	4766	4745	57	274.5
319.6		5178	5156	78	4772	4752	56	274.7
319.8		5189	5166	78	4779	4759	56	274.9
320		5195	5172	78	4784	4764	57	275.1
320.2		5201	5179	78	4790	4770	56	275.2
320.4		5209	5186	78	4796	4776	56	275.4
320.6		5215	5191	78	4803	4782	55	275.6
320.8		5221	5197	78	4809	4789	56	275.8
321		5227	5203	78	4815	4795	55	276
321.2		5234	5210	78	4821	4800	56	276.2
321.4		5240	5216	78	4827	4806	55	276.3
321.6		5246	5221	78	4833	4812	55	276.5
321.8		5253	5228	78	4840	4819	55	276.7
322		5259	5235	78	4847	4826	55	276.9
322.2		5266	5241	78	4853	4832	55	277.1
322.4		5272	5247	78	4860	4837	55	277.3
322.6		5279	5254	78	4866	4844	56	277.4
322.8		5287	5262	78	4871	4850	55	277.6
323		5294	5269	78	4878	4856	55	277.8
323.2		5300	5275	78	4884	4863	55	278
323.4		5311	5285	78	4889	4867	57	278.2
323.6		5318	5293	78	4894	4873	55	278.4
323.8		5324	5299	78	4901	4880	55	278.5
324		5331	5306	79	4908	4887	55	278.7
324.2		5338	5312	79	4915	4894	55	278.9
324.4		5346	5320	79	4922	4901	55	279.1
324.6		5353	5328	79	4929	4909	55	279.3
324.8		5360	5335	79	4935	4916	56	279.5
325		5367	5341	79	4943	4923	55	279.6
325.2		5373	5347	79	4950	4930	55	279.8
325.4		5379	5353	79	4956	4937	55	280
325.6		5386	5360	79	4963	4944	55	280.2
325.8		5392	5366	79	4969	4950	55	280.4
326		5399	5373	79	4977	4958	56	280.6
326.2		5408	5381	79	4984	4965	55	280.7
326.4		5414	5388	79	4990	4972	55	280.9
326.6		5421	5395	79	4996	4978	55	281.1
326.8		5430	5403	79	5004	4985	56	281.3
327		5437	5409	79	5011	4992	55	281.5
327.2		5441	5414	80	5018	5000	55	281.7
327.4		5448	5422	80	5024	5006	55	281.8
327.6		5455	5429	80	5031	5012	55	282
327.8		5462	5435	80	5037	5018	55	282.2
328		5469	5442	80	5044	5025	55	282.4
328.2		5474	5448	80	5050	5032	55	282.6
328.4		5480	5455	80	5057	5039	55	282.8
328.6		5489	5462	80	5064	5045	55	282.9
328.8		5494	5468	80	5070	5051	56	283.1
329		5499	5473	80	5077	5058	55	283.3
329.2		5506	5480	80	5084	5066	56	283.5
329.4		5512	5486	80	5092	5073	55	283.7
329.6		5519	5492	80	5098	5078	55	283.9
329.8		5527	5500	80	5105	5086	56	284
330		5532	5506	80	5112	5092	56	284.2
330.2		5539	5512	80	5120	5100	56	284.4
330.4		5545	5518	80	5127	5107	56	284.6
330.6		5551	5524	80	5134	5113	56	284.8
330.8		5558	5530	80	5140	5120	56	285
331		5565	5538	80	5145	5125	56	285.1
331.2		5572	5545	80	5153	5132	57	285.3
331.4		5577	5550	80	5161	5139	57	285.5
331.6		5584	5556	81	5169	5147	56	285.7
331.8		5590	5562	81	5177	5155	60	285.9
332		5597	5570	81	5188	5166	60	286.1
332.2		5605	5577	81	5195	5172	56	286.2
332.4		5612	5584	81	5202	5180	56	286.4
332.6		5621	5592	81	5210	5187	56	286.6
332.8		5627	5599	81	5216	5193	57	286.8
333		5635	5607	81	5223	5199	57	287
333.2		5640	5613	81	5230	5206	57	287.2
333.4		5648	5620	81	5237	5213	57	287.3
333.6		5654	5628	81	5243	5219	57	287.5
333.8		5661	5635	81	5251	5226	58	287.7
334		5667	5641	81	5258	5233	57	287.9
334.2		5673	5645	81	5264	5240	57	288.1
334.4		5679	5652	81	5271	5247	57	288.3
334.6		5686	5659	81	5279	5254	58	288.4
334.8		5693	5666	81	5288	5262	58	288.6
335		5700	5673	81	5295	5270	57	288.8
335.2		5708	5681	81	5302	5277	62	289
335.4		5715	5688	82	5313	5287	59	289.2
335.6		5722	5695	82	5320	5295	58	289.4
335.8		5728	5701	82	5327	5302	58	289.5
336		5736	5708	82	5335	5309	58	289.7
336.2		5742	5714	82	5343	5316	59	289.9
336.4		5748	5721	82	5351	5325	58	290.1
336.6		5754	5727	82	5358	5333	58	290.3
336.8		5760	5732	82	5365	5340	58	290.5
337		5767	5739	82	5372	5346	58	290.6
337.2		5774	5747	82	5379	5353	58	290.8
337.4		5782	5755	82	5386	5360	58	291
337.6		5789	5762	82	5393	5367	59	291.2
337.8		5797	5769	82	5401	5374	60	291.4
338		5806	5779	82	5409	5382	59	291.6
338.2		5813	5786	82	5417	5390	59	291.7
338.4		5820	5793	82	5425	5398	61	291.9
338.6		5827	5799	82	5433	5406	59	292.1
338.8		5834	5807	82	5439	5412	61	292.3
339		5842	5816	82	5446	5419	59	292.5
339.2		5850	5823	82	5453	5427	59	292.7
339.4		5860	5833	82	5461	5434	59	292.8
339.6		5867	5840	82	5468	5441	60	293
339.8		5876	5849	82	5474	5448	60	293.2
340		5883	5856	82	5481	5455	60	293.4
340.2		5891	5863	82	5489	5463	60	293.6
340.4		5899	5872	82	5495	5468	61	293.8
340.6		5905	5878	82	5501	5474	60	293.9
340.8		5910	5883	82	5508	5482	60	294.1
341		5916	5889	82	5515	5489	60	294.3
341.2		5924	5897	82	5523	5496	61	294.5
341.4		5930	5904	82	5530	5503	61	294.7
341.6		5938	5911	82	5536	5510	60	294.9
341.8		5946	5919	82	5543	5516	60	295
342		5955	5929	82	5550	5523	60	295.2
342.2		5964	5937	82	5557	5529	60	295.4
342.4		5973	5945	82	5565	5538	61	295.6
342.6		5980	5952	82	5572	5545	61	295.8
342.8		5986	5958	82	5578	5551	61	296
343		5993	5966	82	5585	5557	61	296.1
343.2		6001	5973	82	5592	5564	61	296.3
343.4		6010	5981	82	5600	5572	61	296.5
343.6		6020	5992	82	5608	5580	61	296.7
343.8		6027	5999	82	5616	5588	62	296.9
344		6035	6006	82	5624	5596	61	297.1
344.2		6042	6015	82	5632	5604	61	297.2
344.4		6049	6022	82	5639	5611	61	297.4
344.6		6058	6031	82	5646	5619	61	297.6
344.8		6067	6039	82	5654	5627	61	297.8
345		6076	6049	82	5661	5634	61	298
345.2		6084	6058	82	5668	5641	62	298.2
345.4		6092	6065	82	5673	5646	61	298.3
345.6		6100	6073	82	5680	5653	61	298.5
345.8		6108	6081	82	5688	5661	61	298.7
346		6116	6088	82	5695	5668	61	298.9
346.2		6123	6095	82	5703	5676	62	299.1
346.4		6130	6102	82	5712	5684	61	299.3
346.6		6138	6110	82	5719	5692	61	299.4
346.8		6146	6118	82	5726	5699	61	299.6
347		6155	6126	83	5734	5706	61	299.8
347.2		6165	6137	83	5740	5713	62	300
347.4		6173	6145	83	5747	5720	62	300.2
347.6		6180	6151	83	5754	5727	62	300.4
347.8		6187	6158	83	5760	5732	62	300.5
348		6197	6169	83	5767	5739	61	300.7
348.2		6206	6177	83	5775	5748	62	300.9
348.4		6214	6185	83	5784	5757	61	301.1
348.6		6224	6195	83	5791	5764	62	301.3
348.8		6235	6206	83	5800	5773	63	301.5
349		6244	6214	83	5809	5782	61	301.6
349.2		6253	6223	83	5817	5790	61	301.8
349.4		6263	6234	83	5824	5797	62	302
349.6		6271	6241	83	5832	5805	62	302.2
349.8		6282	6252	84	5841	5814	62	302.4
350		6289	6260	84	5849	5822	63	302.6
350.2		6299	6269	84	5860	5832	62	302.7
350.4		6309	6279	84	5867	5840	62	302.9
350.6		6318	6289	84	5877	5850	62	303.1
350.8		6327	6297	84	5884	5857	61	303.3
351		6335	6305	84	5893	5866	62	303.5
351.2		6343	6314	85	5901	5874	62	303.7
351.4		6354	6327	85	5907	5880	63	303.9
351.6		6364	6337	85	5913	5886	61	304
351.8		6373	6348	85	5920	5893	61	304.2
352		6383	6357	85	5928	5901	61	304.4
352.2		6392	6366	86	5936	5909	61	304.6
352.4		6400	6375	86	5944	5917	62	304.8
352.6		6409	6384	86	5954	5927	63	304.9
352.8		6418	6393	86	5963	5936	62	305.1
353		6425	6400	86	5973	5945	61	305.3
353.2		6435	6411	87	5980	5952	61	305.5
353.4		6444	6419	87	5987	5960	61	305.7
353.6		6451	6426	87	5995	5967	61	305.9
353.8		6460	6436	87	6004	5975	62	306.1
354		6468	6444	87	6014	5986	64	306.2
354.2		6477	6452	87	6023	5995	61	306.4
354.4		6486	6461	88	6031	6003	61	306.6
354.6		6497	6474	88	6039	6011	61	306.8
354.8		6507	6483	88	6047	6020	61	307
355		6516	6492	88	6056	6029	62	307.1
355.2		6523	6501	89	6066	6038	62	307.3
355.4		6531	6509	89	6075	6048	62	307.5
355.6		6542	6519	89	6085	6058	61	307.7
355.8		6551	6530	89	6093	6065	61	307.9
356		6560	6539	90	6101	6074	61	308.1
356.2		6569	6548	90	6110	6083	61	308.3
356.4		6579	6559	90	6118	6091	61	308.4
356.6		6587	6567	90	6126	6098	61	308.6
356.8		6596	6576	91	6133	6106	61	308.8
357		6607	6587	91	6142	6115	62	309
357.2		6617	6597	91	6152	6123	62	309.2
357.4		6624	6604	91	6162	6134	63	309.3
357.6		6634	6614	92	6171	6143	61	309.5
357.8		6644	6624	92	6179	6150	61	309.7
358		6653	6633	92	6187	6158	62	309.9
358.2		6661	6642	93	6197	6169	63	310.1
358.4		6671	6653	93	6207	6178	62	310.3
358.6		6679	6660	93	6216	6186	63	310.5
358.8		6687	6668	94	6227	6198	66	310.6
359		6696	6678	94	6238	6208	63	310.8
359.2		6707	6689	94	6247	6217	63	311
359.4		6718	6700	95	6257	6228	65	311.2
359.6		6727	6710	95	6267	6238	63	311.4
359.8		6738	6722	95	6277	6247	67	311.6
360		6747	6730	95	6287	6257	63	311.7
360.2		6757	6741	96	6297	6267	65	311.9
360.4		6767	6751	96	6307	6277	65	312.1
360.6		6778	6762	96	6317	6288	64	312.3
360.8		6789	6774	97	6326	6297	64	312.5
361		6799	6783	97	6335	6306	64	312.7
361.2		6808	6793	97	6344	6316	66	312.8
361.4		6817	6803	98	6356	6329	68	313
361.6		6826	6812	98	6366	6340	67	313.2
361.8		6835	6821	98	6377	6351	66	313.4
362		6847	6834	98	6386	6361	66	313.6
362.2		6856	6842	99	6396	6370	66	313.8
362.4		6865	6852	99	6405	6380	67	313.9
362.6		6876	6863	99	6414	6389	67	314.1
362.8		6886	6873	99	6423	6398	67	314.3
363		6896	6883	100	6433	6409	69	314.5
363.2		6904	6893	100	6443	6418	68	314.7
363.4		6914	6902	100	6451	6426	68	314.9
363.6		6923	6911	100	6460	6436	68	315
363.8		6932	6921	100	6468	6444	69	315.2
364		6943	6931	101	6478	6453	70	315.4
364.2		6952	6940	101	6488	6464	72	315.6
364.4		6961	6950	101	6499	6476	72	315.8
364.6		6969	6958	101	6510	6486	71	316
364.8		6979	6967	101	6519	6496	70	316.1
365		6988	6977	102	6527	6505	71	316.3
365.2		6999	6988	102	6537	6515	73	316.5
365.4		7008	6996	102	6547	6526	72	316.7
365.6		7018	7008	102	6557	6536	73	316.9
365.8		7029	7018	102	6567	6546	73	317.1
366		7038	7027	102	6577	6557	74	317.2
366.2		7048	7038	103	6586	6566	74	317.4
366.4		7058	7048	103	6596	6575	75	317.6
366.6		7067	7056	103	6607	6587	77	317.8
366.8		7078	7067	103	6617	6598	75	318
367		7089	7078	103	6626	6606	76	318.2
367.2		7099	7086	103	6636	6617	77	318.3
367.4		7110	7098	103	6646	6627	77	318.5
367.6		7121	7108	104	6656	6636	77	318.7
367.8		7130	7117	104	6665	6646	79	318.9
368		7138	7125	104	6675	6656	77	319.1
368.2		7147	7135	104	6683	6664	78	319.3
368.4		7156	7142	104	6692	6674	79	319.4
368.6		7165	7151	104	6703	6685	81	319.6
368.8		7174	7161	104	6714	6696	82	319.8
369		7184	7170	104	6725	6708	81	320
369.2		7194	7180	104	6736	6720	82	320.2
369.4		7205	7192	104	6746	6729	81	320.4
369.6		7214	7202	104	6756	6740	83	320.5
369.8		7224	7212	104	6767	6751	84	320.7
370		7234	7223	104	6778	6762	85	320.9
370.2		7247	7235	104	6790	6775	84	321.1
370.4		7256	7245	104	6800	6785	84	321.3
370.6		7268	7257	104	6810	6796	83	321.5
370.8		7279	7268	104	6820	6806	84	321.6
371		7289	7279	104	6830	6815	84	321.8
371.2		7299	7288	103	6840	6827	88	322
371.4		7309	7297	103	6851	6838	85	322.2
371.6		7318	7307	103	6861	6847	86	322.4
371.8		7330	7318	103	6871	6859	87	322.6
372		7341	7328	103	6882	6870	87	322.7
372.2		7353	7342	103	6893	6880	87	322.9
372.4		7362	7351	103	6902	6891	87	323.1
372.6		7371	7359	103	6913	6901	88	323.3
372.8		7381	7369	102	6922	6910	87	323.5
373		7389	7377	102	6932	6921	88	323.7
373.2		7399	7386	102	6943	6931	89	323.8
373.4		7408	7396	102	6953	6941	88	324
373.6		7419	7407	102	6962	6951	88	324.2
373.8		7427	7414	102	6971	6960	89	324.4
374		7438	7425	101	6981	6970	89	324.6
374.2		7447	7435	101	6992	6981	91	324.8
374.4		7458	7445	101	7002	6991	89	324.9
374.6		7468	7455	101	7012	7001	92	325.1
374.8		7477	7464	100	7023	7013	91	325.3
375		7485	7471	100	7034	7023	91	325.5
375.2		7493	7479	100	7044	7034	91	325.7
375.4		7501	7487	100	7055	7045	91	325.9
375.6		7509	7496	100	7065	7054	91	326
375.8		7519	7505	99	7076	7065	93	326.2
376		7530	7516	99	7088	7076	92	326.4
376.2		7540	7526	99	7098	7086	92	326.6
376.4		7549	7535	98	7110	7098	93	326.8
376.6		7561	7547	98	7121	7108	92	327
376.8		7570	7556	98	7131	7117	91	327.1
377		7582	7567	97	7140	7127	91	327.3
377.2		7592	7578	97	7149	7136	91	327.5
377.4		7604	7590	96	7158	7145	91	327.7
377.6		7615	7600	96	7168	7154	92	327.9
377.8		7623	7609	96	7178	7165	92	328.1
378		7632	7617	95	7189	7174	93	328.2
378.2		7642	7627	95	7200	7186	93	328.4
378.4		7654	7640	94	7210	7198	92	328.6
378.6		7664	7649	94	7221	7208	92	328.8
378.8		7672	7657	93	7231	7220	93	329
379		7681	7666	93	7244	7232	95	329.2
379.2		7690	7676	93	7255	7244	92	329.3
379.4		7700	7685	92	7267	7256	94	329.5
379.6		7710	7696	92	7279	7267	93	329.7
379.8		7719	7705	91	7290	7279	92	329.9
380		7729	7714	91	7300	7289	91	330.1
380.2		7740	7725	90	7310	7299	91	330.3
380.4		7750	7735	90	7321	7310	92	330.4
380.6		7760	7745	89	7333	7321	92	330.6
380.8		7770	7755	89	7345	7333	94	330.8
381		7782	7767	88	7357	7345	91	331
381.2		7793	7778	88	7366	7354	89	331.2
381.4		7803	7789	88	7376	7364	90	331.4
381.6		7814	7799	87	7386	7374	89	331.5
381.8		7823	7808	87	7395	7383	90	331.7
382		7833	7818	86	7405	7393	89	331.9
382.2		7845	7829	86	7417	7404	89	332.1
382.4		7855	7839	85	7426	7413	88	332.3
382.6		7864	7848	85	7436	7423	88	332.5
382.8		7873	7857	84	7447	7434	88	332.6
383		7883	7865	84	7458	7445	88	332.8
383.2		7893	7874	83	7469	7456	87	333
383.4		7901	7882	83	7478	7465	86	333.2
383.6		7910	7892	83	7486	7473	86	333.4
383.8		7920	7900	82	7495	7481	85	333.6
384		7930	7911	82	7503	7490	85	333.7
384.2		7938	7920	81	7513	7499	85	333.9
384.4		7948	7929	81	7524	7510	86	334.1
384.6		7956	7938	81	7535	7522	84	334.3
384.8		7965	7947	80	7545	7531	84	334.5
385		7974	7955	80	7557	7542	85	334.7
385.2		7983	7964	79	7567	7554	83	334.8
385.4		7993	7975	79	7579	7564	84	335
385.6		8002	7983	79	7590	7576	83	335.2
385.8		8012	7993	78	7603	7588	83	335.4
386		8023	8004	78	7615	7600	80	335.6
386.2		8032	8012	77	7623	7609	80	335.8
386.4		8042	8021	77	7632	7618	79	335.9
386.6		8051	8031	77	7644	7629	81	336.1
386.8		8061	8040	76	7656	7642	79	336.3
387		8069	8047	76	7666	7651	77	336.5
387.2		8077	8056	76	7675	7660	77	336.7
387.4		8086	8064	76	7684	7670	77	336.9
387.6		8093	8071	75	7695	7680	76	337
387.8		8101	8079	75	7705	7690	76	337.2
388		8111	8089	75	7715	7701	74	337.4
388.2		8121	8098	75	7725	7711	74	337.6
388.4		8129	8105	75	7737	7722	74	337.8
388.6		8139	8116	75	7747	7733	73	338
388.8		8148	8125	74	7758	7743	72	338.1
389		8156	8132	74	7769	7754	72	338.3
389.2		8164	8140	74	7781	7767	73	338.5
389.4		8173	8150	74	7793	7778	70	338.7
389.6		8182	8159	74	7804	7790	69	338.9
389.8		8191	8167	74	7816	7800	68	339.1
390		8201	8177	74	7826	7810	67	339.2
390.2		8211	8187	74	7837	7822	68	339.4
390.4		8220	8195	74	7849	7833	66	339.6
390.6		8231	8205	74	7859	7843	65	339.8
390.8		8240	8214	74	7868	7853	65	340
391		8249	8222	74	7879	7862	64	340.2
391.2		8261	8234	74	7889	7870	63	340.4
391.4		8275	8247	74	7898	7880	63	340.5
391.6		8286	8257	75	7908	7889	62	340.7
391.8		8297	8269	75	7918	7899	61	340.9
392		8308	8282	75	7928	7910	61	341.1
392.2		8319	8293	75	7938	7919	60	341.3
392.4		8330	8305	76	7948	7929	59	341.4
392.6		8341	8315	76	7957	7939	59	341.6
392.8		8352	8326	76	7967	7948	58	341.8
393		8363	8336	77	7976	7957	57	342
393.2		8374	8345	77	7986	7968	57	342.2
393.4		8385	8355	77	7996	7978	56	342.4
393.6		8396	8366	78	8006	7987	56	342.6
393.8		8407	8375	78	8017	7998	55	342.7
394		8418	8387	79	8027	8008	54	342.9
394.2		8429	8397	79	8038	8017	54	343.1
394.4		8439	8407	80	8048	8028	53	343.3
394.6		8450	8418	80	8058	8037	53	343.5
394.8		8461	8428	81	8067	8046	53	343.6
395		8472	8438	81	8076	8054	52	343.8
395.2		8482	8450	82	8085	8063	52	344
395.4		8493	8460	82	8092	8070	52	344.2
395.6		8503	8470	83	8102	8079	51	344.4
395.8		8514	8481	83	8112	8089	50	344.6
396		8525	8491	84	8122	8099	50	344.8
396.2		8535	8501	84	8130	8107	50	344.9
396.4		8546	8512	85	8141	8118	50	345.1
396.6		8556	8522	86	8151	8128	50	345.3
396.8		8566	8532	86	8159	8135	50	345.5
397		8577	8544	87	8168	8145	49	345.7
397.2		8592	8557	88	8178	8155	49	345.8
397.4		8604	8571	88	8187	8163	49	346
397.6		8616	8582	89	8197	8173	49	346.2
397.8		8630	8596	90	8208	8184	49	346.4
398		8642	8608	91	8218	8193	49	346.6
[truncated: 1,260 more rows]
