# Supplementary material for: The ST22 chronology for the Skytrain Ice Rise ice core – part 2: an age model to the last interglacial and disturbed deep stratigraphy
Source: Copernicus journal article supplement (doi:10.5194/cp-2022-84), 2022-11-07
Supplement: Supplementary file 1 [file cp-2022-84-supplement.zip › Table_S2.xlsx]

## Sheet: 10 Be samples
Depths are the middle of samples, each ~16 cm in length
2 samples exhibiting high current and outlier values are marked *** and not plotted
Average blank is 3% of average sample 10Be/9Be value, not corrected
Carrier 0.15 mg 9Be
Depth / m	10Be concentration / 10^4 atoms/g ice	Uncertainty / 10^4 atoms/g ice
508.88	3.48567	0.0944369
509.038	2.8759	0.0809978
509.197	2.93617	0.0691855
509.356	3.59818	0.066523
509.515	3.47804	0.593308
509.673	4.13574	0.0833972
509.837	3.01718	0.0690628
510.003	3.31255	0.0820823
510.168	2.91405	0.0600132
510.333	2.8375	0.0639091
510.48	3.17347	0.0728641
510.64	1.70509	0.0422852	***
510.8	3.58219	0.110494
510.96	3.08867	0.0864264
511.12	3.53785	0.0846669
511.28	3.75911	0.0796218
511.442	3.19992	0.0662718
511.602	3.96433	0.144141
511.764	3.45946	0.0697718
511.924	3.5052	0.0654928
512.081	3.61882	0.0794814
512.241	1.78134	0.0379835	***
512.402	2.81932	0.0577413
512.563	4.54281	0.0881823
512.724	3.77039	0.142213
512.88	4.23584	0.0776143
513.038	4.14815	0.0681025
513.197	3.99127	0.0667532
513.356	3.7979	0.0776042
513.515	3.69243	0.0803246
513.662	5.65958	0.10982
513.826	3.77242	0.0886361
513.99	4.61333	0.090901
514.154	5.01583	0.108557
514.318	4.27358	0.115269
514.48	4.99641	0.0936408
514.641	5.30886	0.0910289
514.802	4.78349	0.0887008
514.963	4.58159	0.0916573
515.124	4.6505	0.088168
515.281	5.45599	0.0853417
515.443	4.36047	0.0796853
515.605	4.82534	0.11113
515.767	3.99915	0.075419
515.929	4.77519	0.102357
516.08	5.94323	0.141038
516.24	5.52159	0.0828238
516.4	4.52085	0.0867686
516.56	5.59544	0.0876672
516.72	5.85274	0.0980513
516.88	5.17108	0.122609
517.041	4.26998	0.0957504
517.202	4.66784	0.0789632
517.363	4.44979	0.0763782
517.524	5.02823	0.123307
517.68	4.58571	0.080219
517.841	5.1228	0.0959471
518.002	4.18991	0.0875539
518.163	4.42347	0.119347
518.324	5.2035	0.0916298
518.476	5.04916	0.143911
518.628	5.66382	0.121142
518.78	5.48716	0.114833
518.932	4.2931	0.0908165
519.084	4.26893	0.125056
519.244	3.82173	0.0863218
519.41	5.18113	0.0964924
519.578	4.2813	0.0976197
519.745	4.89978	0.167688
519.912	3.57055	0.117391
