# Supplementary material for: The ST22 chronology for the Skytrain Ice Rise ice core – part 2: an age model to the last interglacial and disturbed deep stratigraphy
Source: Copernicus journal article supplement (doi:10.5194/cp-2022-84), 2022-11-07
Supplement: Supplementary file 1 [file cp-2022-84-supplement.zip › Table_S3.xlsx]

## Sheet: air_age_horizons
All ages in column B are on AICC2012.
Methane matching down to 554 m was done against records tied to the WD2014 age scale, but ages have been translated to AICC2012.
Depth	Age / a bp	Uncertainty / years	Tie
92.7	355	10	CH4/Oregon
95.2	394	10	CH4/Oregon
111.98	598	10	CH4/Oregon
123	757	10	CH4/Oregon
138.93	928	10	CH4/Oregon
154.6	1154	15	CH4/Oregon
159.5	1219	15	CH4/Oregon
285	3598	100	CH4
290.3	3878	100	CH4
317.5	4745	100	CH4
324.8	4984	100	CH4
336.8	5330	100	CH4
356.8	6005	100	CH4
362.2	6492	100	CH4
398.05	8226	50	CH4
435.98	11289	50	CH4/18Oair
437.15	11356	50	CH4
438.855	11546	50	CH4
439.74	11650	70	CH4
446.43	12862	70	CH4/18Oair
447	12948	70	CH4
449	13307	70	CH4
451.72	13793	70	CH4
453.9	14236	70	CH4
455.18	14574	70	CH4/18Oair
456	14807	70	CH4
465.4	17977	200	CH4
473.75	21825	240	CH4
479.48	24169	240	CH4
486.31	29014	180	CH4
491.4	31282	180	CH4
495.71	32558	180	CH4
499.455	34718	150	CH4
501.39	35557	150	CH4
507.917	38214	150	CH4
518.45	40711	300	CH4
519.8	41321	120	CH4
524.26	43231	150	CH4
526.23	44132	150	CH4
532.252	46673	300	CH4
539.08	50947	300	CH4/Bern
545.57	54285	300	CH4/Bern
547.155	55076	300	CH4
553.333	59888	300	CH4
570.426	76649	100	CH4
575.5	83959.6	300	CH4
578.445	86819.2	300	CH4
596.75	95710	300	CH4
601.85	105250	100	CH4
602.6	106400	300	CH4/18Oair
618.26	117200	200	CH4/18Oair
619.14	118600	200	CH4/18Oair
621.5	120000	200	CH4/18Oair
623.17	121200	300	CH4/18Oair
626.395	126100	200	CH4/18Oair
627.335	126300	200	CH4/18Oair
632.41	164000	1000	CH4/18Oair
