# Supplementary material for: The ST22 chronology for the Skytrain Ice Rise ice core – part 2: an age model to the last interglacial and disturbed deep stratigraphy
Source: Copernicus journal article supplement (doi:10.5194/cp-2022-84), 2022-11-07
Supplement: Supplementary file 1 [file cp-2022-84-supplement.zip › Table_S4.xlsx]

## Sheet: ice_age_horizons
Ties to 1950 bp are taken from the stratigraphic chronology of Hoffmann et al (2022).
Depth	Age / a bp	Uncertainty / years	Tie
0	-69	1	Surface in 2019
13.995	-15	1	Tritium
16.416	0	1.75	Hoffmann et al
33.025	100	2.75	Hoffmann et al
38.29	135	1	Volcanic sulfate and S isotope
45.412	200	6.2	Hoffmann et al
57.725	300	14.2	Hoffmann et al
67.411	400	22.2	Hoffmann et al
75.85	492	1	Volcanic sulfate and S isotope
77.373	500	14.2	Hoffmann et al
87.402	600	6.2	Hoffmann et al
95.38	693	1	Volcanic sulfate and S isotope
96.065	700	1.35	Hoffmann et al
105.057	800	8.9	Hoffmann et al
113.325	900	18.9	Hoffmann et al
121.543	1000	28.9	Hoffmann et al
128.262	1100	38.9	Hoffmann et al
135.394	1200	48.9	Hoffmann et al
142.518	1300	58.9	Hoffmann et al
149.593	1400	68.9	Hoffmann et al
156.103	1500	78.9	Hoffmann et al
162.163	1600	88.9	Hoffmann et al
168.504	1700	98.9	Hoffmann et al
174.295	1800	108.9	Hoffmann et al
180.997	1900	118.9	Hoffmann et al
184.142	1950	123.9	Hoffmann et al
453.1	14700	200	nssMg vs EDC Ca
475.1	23269	100	nssMg vs EDC Ca
480.7	25690	300	nssMg vs EDC Ca
492.7	32120	100	nssMg vs EDC Ca
510.7	39270	150	nssMg vs EDC Ca
512.49	39735	250	nssMg vs EDC Ca
513.66	39926	100	10Be
515.28	40502	100	10Be
516.09	40953	100	10Be
519.24	41824	100	10Be
519.74	42036	100	10Be
525.3	44188	300	nssMg vs EDC Ca
542.1	53319	800	nssMg vs EDC Ca
552.97	59530	200	nssMg vs EDC Ca
557.756	63609	200	nssMg vs EDC Ca
566.1	71900	300	nssMg vs EDC Ca
